# Supplementary material
Source: PubMed Central journal article supplement (PMC2957724)
Supplement: supp_M110.000992_mcp.M110.000992-2.pdf [file supp_M110.000992_mcp.M110.000992-2.pdf]

**Supplementary Table 1. Supplemental documentation for peptide and protein identification in Figure 1.**

| Name                                                                             | Accession          | # unique peptides/protein | Percent Sequence coverage | # peptides used for quantitation | Protein Quantitation |        |
|----------------------------------------------------------------------------------|--------------------|---------------------------|---------------------------|----------------------------------|----------------------|--------|
|                                                                                  |                    |                           |                           |                                  | Mean                 | STDEV  |
| Mannan-binding lectin serine protease 2 precursor - Homo sapiens (Human)         | O00187 MASP2_HUMAN | 7                         | 18.08                     | 5                                | 0.3755               | 0.5445 |
| Voltage-dependent L-type calcium channel subunit alpha-1F - Homo sapiens (Human) | O60840 CAC1F_HUMAN | 10                        | 15.97                     | 2                                | 0.5837               | 0.4035 |
| Plasminogen precursor - Homo sapiens (Human)                                     | P00747 PLMN_HUMAN  | 2                         | 8.89                      | 1                                | 0.3333               | 0.5774 |
| Pepsin A precursor - Homo sapiens (Human)                                        | P00790 PEPA_HUMAN  | 7                         | 21.13                     | 7                                | 0.3913               | 0.5313 |
| Kininogen-1 precursor - Homo sapiens (Human)                                     | P01042 KNG1_HUMAN  | 11                        | 20.34                     | 2                                | 0.4334               | 0.5132 |
| Pro-epidermal growth factor precursor - Homo sapiens (Human)                     | P01133 EGF_HUMAN   | 6                         | 10.85                     | 1                                | 0.4427               | 0.4838 |
| Ig kappa chain C region - Homo sapiens (Human)                                   | P01834 KAC_HUMAN   | 6                         | 35.85                     | 1                                | 0.3733               | 0.5460 |
| Collagen alpha-1(I) chain precursor - Homo sapiens (Human)                       | P02452 CO1A1_HUMAN | 32                        | 53.28                     | 17                               | 0.4152               | 0.5090 |
| Collagen alpha-1(III) chain precursor - Homo sapiens (Human)                     | P02461 CO3A1_HUMAN | 23                        | 41.00                     | 11                               | 0.3930               | 0.5270 |
| Leucine-rich alpha-2-glycoprotein precursor - Homo sapiens (Human)               | P02750 A2GL_HUMAN  | 8                         | 19.02                     | 6                                | 0.4451               | 0.4837 |
| AMBP protein precursor [Contains: Alpha-1-microglobulin - Homo sapiens (Human)]  | P02760 AMBP_HUMAN  | 35                        | 47.44                     | 25                               | 0.4126               | 0.5116 |
| Alpha-1-acid glycoprotein 1 precursor - Homo sapiens (Human)                     | P02763 A1AG1_HUMAN | 19                        | 41.79                     | 16                               | 0.4850               | 0.4469 |
| Alpha-2-HS-glycoprotein precursor - Homo sapiens (Human)                         | P02765 FETUA_HUMAN | 3                         | 22.07                     | 2                                | 0.3745               | 0.5429 |
| Serum albumin precursor - Homo sapiens (Human)                                   | P02768 ALBU_HUMAN  | 52                        | 40.56                     | 53                               | 0.4481               | 0.4788 |
| Alpha-1B-glycoprotein precursor - Homo sapiens (Human)                           | P04217 A1BG_HUMAN  | 5                         | 19.80                     | 1                                | 0.3799               | 0.5416 |
| Apolipoprotein D precursor - Homo sapiens (Human)                                | P05090 APOD_HUMAN  | 15                        | 41.27                     | 8                                | 0.5019               | 0.4332 |
| Gelsolin precursor - Homo sapiens (Human)                                        | P06396 GELS_HUMAN  | 4                         | 18.03                     | 4                                | 0.4224               | 0.5037 |
| Uromodulin precursor - Homo sapiens (Human)                                      | P07911 UROM_HUMAN  | 12                        | 25.00                     | 4                                | 0.4114               | 0.5153 |
| Ribonuclease pancreatic precursor - Homo sapiens (Human)                         | P07998 RNAS1_HUMAN | 4                         | 15.38                     | 2                                | 0.4635               | 0.4704 |
| Collagen alpha-2(I) chain precursor - Homo sapiens (Human)                       | P08123 CO1A2_HUMAN | 12                        | 40.56                     | 3                                | 0.4546               | 0.4782 |

Optimizing a proteomics platform for urine biomarker discovery

|                                                                                                                      |                     |    |       |    |        |        |
|----------------------------------------------------------------------------------------------------------------------|---------------------|----|-------|----|--------|--------|
| Osteopontin precursor - Homo sapiens (Human)                                                                         | P10451 OSTP_HUMAN   | 8  | 28.03 | 4  | 0.4957 | 0.4478 |
| CD59 glycoprotein precursor - Homo sapiens (Human)                                                                   | P13987 CD59_HUMAN   | 24 | 20.31 | 11 | 0.5571 | 0.3844 |
| CD44 antigen precursor - Homo sapiens (Human)                                                                        | P16070 CD44_HUMAN   | 6  | 32.21 | 1  | 0.3333 | 0.5774 |
| Ig kappa chain V-III region HIC precursor - Homo sapiens (Human)                                                     | P18136 KV313_HUMAN  | 4  | 39.53 | 1  | 0.4645 | 0.4755 |
| Alpha-amylase 2B precursor - Homo sapiens (Human)                                                                    | P19961 AMY2B_HUMAN  | 9  | 22.31 | 2  | 0.4436 | 0.5094 |
| Zinc-alpha-2-glycoprotein precursor - Homo sapiens (Human)                                                           | P25311 ZA2G_HUMAN   | 26 | 45.42 | 19 | 0.4484 | 0.4787 |
| Tyrosine-protein kinase receptor UFO precursor - Homo sapiens (Human)                                                | P30530 UFO_HUMAN    | 7  | 22.89 | 1  | 0.3955 | 0.5250 |
| Prostaglandin-H2 D-isomerase precursor - Homo sapiens (Human)                                                        | P41222 PTGDS_HUMAN  | 20 | 47.37 | 9  | 0.3936 | 0.5273 |
| Cadherin-13 precursor - Homo sapiens (Human)                                                                         | P55290 CAD13_HUMAN  | 4  | 13.88 | 2  | 0.4732 | 0.5021 |
| Beta-defensin 1 precursor - Homo sapiens (Human)                                                                     | P60022 BD01_HUMAN   | 2  | 20.59 | 1  | 0.3751 | 0.5448 |
| Basement membrane-specific heparan sulfate proteoglycan core protein precursor - Homo sapiens (Human)                | P98160 PGBM_HUMAN   | 13 | 23.25 | 2  | 0.4334 | 0.4945 |
| Low-density lipoprotein receptor-related protein 2 precursor - Homo sapiens (Human)                                  | P98164 LRP2_HUMAN   | 5  | 9.02  | 3  | 0.4889 | 0.4485 |
| Serine/threonine-protein phosphatase 2A regulatory subunit B" subunit alpha - Homo sapiens (Human)                   | Q06190 P2R3A_HUMAN  | 3  | 9.13  | 3  | 0.4516 | 0.4775 |
| Vesicular integral-membrane protein VIP36 precursor - Homo sapiens (Human)                                           | Q12907 ILMAN2_HUMAN | 3  | 22.47 | 2  | 0.5076 | 0.4343 |
| Vacuolar protein sorting-associated protein 13D - Homo sapiens (Human)                                               | Q5THJ4 VP13D_HUMAN  | 8  | 9.98  | 1  | 0.8141 | 0.3062 |
| Vasorin precursor - Homo sapiens (Human)                                                                             | Q6EMK4 VASN_HUMAN   | 5  | 20.06 | 2  | 0.3669 | 0.5506 |
| RNA-binding protein MEX3B - Homo sapiens (Human)                                                                     | Q6ZN04 MEX3B_HUMAN  | 2  | 12.30 | 1  | 0.5249 | 0.5019 |
| SWI/SNF-related matrix-associated actin-dependent regulator of chromatin subfamily C member 2 - Homo sapiens (Human) | Q8TAQ2 SMRC2_HUMAN  | 2  | 10.79 | 1  | 0.3744 | 0.5429 |
| Mucin-16 - Homo sapiens (Human)                                                                                      | Q8WXI7 MUC16_HUMAN  | 16 | 14.94 | 2  | 0.4259 | 0.5061 |
| Phosphoinositide-3-kinase-interacting protein 1 precursor - Homo sapiens (Human)                                     | Q96FE7 P3IP1_HUMAN  | 10 | 43.73 | 2  | 0.4496 | 0.5076 |
| Endothelial protein C receptor precursor - Homo sapiens (Human)                                                      | Q9UNN8 EPCR_HUMAN   | 2  | 18.91 | 1  | 0.4277 | 0.5001 |

**Supplementary Table 2. Supplemental documentation for peptide and protein identification in Figure 2.**

| Name                                                                                        | Accession          | # unique peptides/protein | Percent Sequence coverage | # peptides used for quantitation | Protein Measurement |        |
|---------------------------------------------------------------------------------------------|--------------------|---------------------------|---------------------------|----------------------------------|---------------------|--------|
|                                                                                             |                    |                           |                           |                                  | Mean                | STDEV  |
| Mannan-binding lectin serine protease 2 precursor - Homo sapiens (Human)                    | O00187 MASP2_HUMAN | 4                         | 12.10                     | 2                                | 0.6451              | 0.4246 |
| Perilipin - Homo sapiens (Human)                                                            | O60240 PLIN_HUMAN  | 3                         | 10.73                     | 1                                | 0.6273              | 0.3500 |
| Cubilin precursor - Homo sapiens (Human)                                                    | O60494 CUBN_HUMAN  | 5                         | 6.62                      | 2                                | 0.9755              | 0.7878 |
| Low affinity immunoglobulin gamma Fc region receptor III-B precursor - Homo sapiens (Human) | O75015 FCG3B_HUMAN | 2                         | 14.59                     | 2                                | 0.6102              | 0.4965 |
| Peptidoglycan recognition protein precursor - Homo sapiens (Human)                          | O75594 PGRP_HUMAN  | 5                         | 19.90                     | 3                                | 0.8635              | 0.8381 |
| Neuronal pentraxin receptor - Homo sapiens (Human)                                          | O95502 NPTXR_HUMAN | 2                         | 21.24                     | 2                                | 0.6933              | 0.5369 |
| Long-chain-fatty-acid--CoA ligase 3 - Homo sapiens (Human)                                  | O95573 ACSL3_HUMAN | 4                         | 10.00                     | 2                                | 0.5898              | 0.3559 |
| Interleukin-18-binding protein precursor - Homo sapiens (Human)                             | O95998 I18BP_HUMAN | 2                         | 12.18                     | 1                                | 0.7214              | 0.5204 |
| Plasminogen precursor - Homo sapiens (Human)                                                | P00747 PLMN_HUMAN  | 3                         | 18.64                     | 1                                | 0.7552              | 0.5476 |
| Complement factor B precursor - Homo sapiens (Human)                                        | P00751 CFAB_HUMAN  | 7                         | 15.58                     | 2                                | 0.8030              | 0.5742 |
| Pepsin A precursor - Homo sapiens (Human)                                                   | P00790 PEPA_HUMAN  | 2                         | 14.43                     | 3                                | 0.5856              | 0.4218 |
| Kininogen-1 precursor - Homo sapiens (Human)                                                | P01042 KNG1_HUMAN  | 19                        | 30.90                     | 24                               | 0.9859              | 0.9684 |
| Pro-epidermal growth factor precursor - Homo sapiens (Human)                                | P01133 EGF_HUMAN   | 13                        | 17.23                     | 7                                | 0.6259              | 0.4075 |
| Polymeric immunoglobulin receptor precursor - Homo sapiens (Human)                          | P01833 PIGR_HUMAN  | 9                         | 18.85                     | 4                                | 0.8031              | 0.6656 |
| Ig kappa chain C region - Homo sapiens (Human)                                              | P01834 KAC_HUMAN   | 9                         | 75.47                     | 9                                | 1.0243              | 0.7503 |
| Ig mu chain C region - Homo sapiens (Human)                                                 | P01871 MUC_HUMAN   | 6                         | 14.32                     | 4                                | 0.7544              | 0.5272 |
| Ig alpha-2 chain C region - Homo sapiens (Human)                                            | P01877 IGHA2_HUMAN | 4                         | 16.18                     | 3                                | 0.6122              | 0.4144 |
| Collagen alpha-1(I) chain precursor - Homo sapiens (Human)                                  | P02452 CO1A1_HUMAN | 46                        | 53.55                     | 29                               | 0.7781              | 0.5856 |
| Collagen alpha-1(III) chain precursor - Homo sapiens (Human)                                | P02461 CO3A1_HUMAN | 30                        | 50.82                     | 17                               | 0.7138              | 0.5138 |
| Fibronectin precursor - Homo sapiens (Human)                                                | P02751 FNC_HUMAN   | 12                        | 8.97                      | 2                                | 0.8053              | 0.5535 |
| AMBIP protein precursor [Contains: Alpha-1-                                                 | P02760 AMBIP_HUMAN | 40                        | 58.52                     | 62                               | 0.7501              | 0.5751 |

Optimizing a proteomics platform for urine biomarker discovery

|                                                                                                |                    |     |       |     |        |        |
|------------------------------------------------------------------------------------------------|--------------------|-----|-------|-----|--------|--------|
| microglobulin - Homo sapiens (Human)                                                           |                    |     |       |     |        |        |
| Alpha-1-acid glycoprotein 1 precursor - Homo sapiens (Human)                                   | P02763 A1AG1_HUMAN | 5   | 22.39 | 2   | 0.5411 | 0.4219 |
| Alpha-2-HS-glycoprotein precursor - Homo sapiens (Human)                                       | P02765 FETUA_HUMAN | 8   | 33.24 | 9   | 0.7855 | 0.5725 |
| Serum albumin precursor - Homo sapiens (Human)                                                 | P02768 ALBU_HUMAN  | 100 | 67.65 | 205 | 0.8155 | 0.6383 |
| Serotransferrin precursor - Homo sapiens (Human)                                               | P02787 TRFE_HUMAN  | 4   | 12.61 | 3   | 0.8923 | 0.6521 |
| Major prion protein precursor - Homo sapiens (Human)                                           | P04156 PRIO_HUMAN  | 5   | 29.64 | 6   | 0.8411 | 0.6581 |
| Apolipoprotein D precursor - Homo sapiens (Human)                                              | P05090 APOD_HUMAN  | 13  | 34.92 | 13  | 0.8532 | 0.6630 |
| Plasma serine protease inhibitor precursor - Homo sapiens (Human)                              | P05154 IPSP_HUMAN  | 3   | 11.58 | 2   | 0.5584 | 0.5039 |
| Proactivator polypeptide precursor [Contains: Saposin-A - Homo sapiens (Human)]                | P07602 SAP_HUMAN   | 2   | 13.74 | 3   | 0.9245 | 0.9926 |
| Uromodulin precursor - Homo sapiens (Human)                                                    | P07911 UROM_HUMAN  | 29  | 49.38 | 56  | 0.8413 | 0.6349 |
| Collagen alpha-2(I) chain precursor - Homo sapiens (Human)                                     | P08123 CO1A2_HUMAN | 26  | 40.04 | 4   | 0.7100 | 0.4680 |
| Extracellular superoxide dismutase [Cu-Zn] precursor - Homo sapiens (Human)                    | P08294 SODE_HUMAN  | 2   | 12.92 | 4   | 0.6518 | 0.4902 |
| Osteopontin precursor - Homo sapiens (Human)                                                   | P10451 OSTP_HUMAN  | 5   | 23.25 | 7   | 0.7331 | 0.5326 |
| Uteroglobin precursor - Homo sapiens (Human)                                                   | P11684 UTER_HUMAN  | 3   | 29.67 | 7   | 0.7859 | 0.6348 |
| Collagen alpha-1(VI) chain precursor - Homo sapiens (Human)                                    | P12109 CO6A1_HUMAN | 4   | 14.11 | 2   | 0.9618 | 1.0157 |
| CD59 glycoprotein precursor - Homo sapiens (Human)                                             | P13987 CD59_HUMAN  | 19  | 37.50 | 37  | 0.7684 | 0.7182 |
| Prostatic acid phosphatase precursor - Homo sapiens (Human)                                    | P15309 PPAP_HUMAN  | 3   | 10.36 | 2   | 0.6838 | 0.4687 |
| CD44 antigen precursor - Homo sapiens (Human)                                                  | P16070 CD44_HUMAN  | 10  | 25.88 | 8   | 0.7003 | 0.6174 |
| Alpha-amylase 2B precursor - Homo sapiens (Human)                                              | P19961 AMY2B_HUMAN | 4   | 16.63 | 3   | 0.6664 | 0.5139 |
| Sarcoplasmic reticulum histidine-rich calcium-binding protein precursor - Homo sapiens (Human) | P23327 SRCH_HUMAN  | 2   | 6.29  | 3   | 0.7197 | 0.5026 |
| Receptor-type tyrosine-protein phosphatase delta precursor - Homo sapiens (Human)              | P23468 PTPRD_HUMAN | 6   | 13.55 | 2   | 0.7952 | 0.6215 |
| Zinc-alpha-2-glycoprotein precursor - Homo sapiens (Human)                                     | P25311 ZA2G_HUMAN  | 11  | 31.86 | 15  | 0.7609 | 0.5734 |
| CD27 antigen precursor - Homo sapiens (Human)                                                  | P26842 CD27_HUMAN  | 2   | 9.62  | 2   | 0.9397 | 0.6727 |

Optimizing a proteomics platform for urine biomarker discovery

|                                                                                                       |                    |    |       |    |        |        |
|-------------------------------------------------------------------------------------------------------|--------------------|----|-------|----|--------|--------|
| Tyrosine-protein kinase receptor UFO precursor - Homo sapiens (Human)                                 | P30530 UFO_HUMAN   | 6  | 20.52 | 8  | 0.8684 | 0.6326 |
| Basigin precursor - Homo sapiens (Human)                                                              | P35613 BASI_HUMAN  | 3  | 13.25 | 1  | 0.7716 | 0.4835 |
| Prostaglandin-H2 D-isomerase precursor - Homo sapiens (Human)                                         | P41222 PTGDS_HUMAN | 14 | 41.58 | 12 | 0.7249 | 0.5263 |
| Dipeptidyl aminopeptidase-like protein 6 - Homo sapiens (Human)                                       | P42658 DPP6_HUMAN  | 3  | 7.28  | 1  | 0.8308 | 0.7282 |
| Cadherin-13 precursor - Homo sapiens (Human)                                                          | P55290 CAD13_HUMAN | 6  | 13.46 | 7  | 0.7682 | 0.5577 |
| Beta-defensin 1 precursor - Homo sapiens (Human)                                                      | P60022 BD01_HUMAN  | 9  | 66.18 | 20 | 0.7022 | 0.5070 |
| HERV-K_12q14.1 provirus ancestral Env polyprotein precursor - Homo sapiens (Human)                    | P61565 ENK1_HUMAN  | 2  | 6.30  | 3  | 0.7403 | 0.4467 |
| Beta-2-microglobulin precursor [Contains: Beta-2-microglobulin form pI 5.3] - Homo sapiens (Human)    | P61769 B2MG_HUMAN  | 2  | 22.69 | 3  | 0.9289 | 0.8526 |
| Ubiquitin - Homo sapiens (Human)                                                                      | P62988 UBIQ_HUMAN  | 10 | 77.63 | 10 | 0.7555 | 0.5349 |
| Hemoglobin subunit beta - Homo sapiens (Human)                                                        | P68871 HBB_HUMAN   | 3  | 22.45 | 2  | 0.5083 | 0.3876 |
| Fibulin-2 precursor - Homo sapiens (Human)                                                            | P98095 FBLN2_HUMAN | 3  | 10.39 | 1  | 1.0189 | 1.2953 |
| Basement membrane-specific heparan sulfate proteoglycan core protein precursor - Homo sapiens (Human) | P98160 PGBM_HUMAN  | 48 | 35.53 | 27 | 0.8047 | 0.5603 |
| Nucleosome-remodeling factor subunit BPTF - Homo sapiens (Human)                                      | Q12830 BPTF_HUMAN  | 16 | 12.76 | 2  | 0.7652 | 0.5233 |
| Receptor-type tyrosine-protein phosphatase eta precursor - Homo sapiens (Human)                       | Q12913 PTPRJ_HUMAN | 4  | 7.48  | 2  | 0.8418 | 0.7564 |
| Protein tyrosine phosphatase type IVA protein 2 - Homo sapiens (Human)                                | Q12974 TP4A2_HUMAN | 2  | 22.16 | 1  | 0.6472 | 0.3981 |
| Makorin-3 - Homo sapiens (Human)                                                                      | Q13064 MKRN3_HUMAN | 3  | 14.20 | 2  | 0.7215 | 0.5037 |
| Dedicator of cytokinesis protein 1 - Homo sapiens (Human)                                             | Q14185 DOCK1_HUMAN | 7  | 7.08  | 2  | 0.7889 | 0.6231 |
| SPARC-like protein 1 precursor - Homo sapiens (Human)                                                 | Q14515 SPRL1_HUMAN | 4  | 11.60 | 1  | 0.7275 | 0.4992 |
| Inositol 1,4,5-trisphosphate receptor type 2 - Homo sapiens (Human)                                   | Q14571 ITPR2_HUMAN | 9  | 10.85 | 1  | 0.8916 | 0.7910 |
| Inter-alpha-trypsin inhibitor heavy chain H4 precursor - Homo sapiens (Human)                         | Q14624 ITI4_HUMAN  | 7  | 19.35 | 8  | 0.7555 | 0.5408 |
| Chromodomain-helicase-DNA-binding protein 4 - Homo sapiens (Human)                                    | Q14839 CHD4_HUMAN  | 8  | 7.79  | 1  | 0.8831 | 0.8034 |

Optimizing a proteomics platform for urine biomarker discovery

|                                                                                          |                    |    |       |    |        |        |
|------------------------------------------------------------------------------------------|--------------------|----|-------|----|--------|--------|
| Serum paraoxonase/lactonase 3 - Homo sapiens (Human)                                     | Q15166 PON3_HUMAN  | 2  | 5.08  | 1  | 1.8249 | 3.1734 |
| Cystatin-M precursor - Homo sapiens (Human)                                              | Q15828 CYTM_HUMAN  | 2  | 10.74 | 1  | 0.8893 | 0.8796 |
| Vasorin precursor - Homo sapiens (Human)                                                 | Q6EMK4 VASN_HUMAN  | 5  | 16.49 | 3  | 0.7066 | 0.5050 |
| Leukocyte-associated immunoglobulin-like receptor 1 precursor - Homo sapiens (Human)     | Q6GTX8 LAIR1_HUMAN | 3  | 18.82 | 4  | 0.7171 | 0.5374 |
| CMRF35-like molecule 9 precursor - Homo sapiens (Human)                                  | Q6UXG3 CLM9_HUMAN  | 5  | 13.55 | 2  | 0.4132 | 0.3560 |
| Taste receptor type 1 member 3 precursor - Homo sapiens (Human)                          | Q7RTX0 TS1R3_HUMAN | 5  | 8.57  | 1  | 0.6839 | 0.6122 |
| Ovochymase-1 precursor - Homo sapiens (Human)                                            | Q7RTY7 OVCH1_HUMAN | 4  | 4.59  | 1  | 0.6988 | 0.3985 |
| Extracellular sulfatase Sulf-2 precursor - Homo sapiens (Human)                          | Q8IWU5 SULF2_HUMAN | 6  | 13.45 | 7  | 0.8029 | 0.5670 |
| Uncharacterized protein C4orf37 - Homo sapiens (Human)                                   | Q8N412 CD037_HUMAN | 2  | 8.93  | 2  | 0.7744 | 0.5856 |
| Myeloid/lymphoid or mixed-lineage leukemia protein 3 homolog - Homo sapiens (Human)      | Q8NEZ4 MLL3_HUMAN  | 18 | 11.08 | 1  | 0.3697 | 0.4921 |
| Zinc transporter 5 - Homo sapiens (Human)                                                | Q8TAD4 ZNT5_HUMAN  | 5  | 13.07 | 4  | 0.6776 | 0.4570 |
| Hepatitis A virus cellular receptor 2 precursor - Homo sapiens (Human)                   | Q8TDQ0 TIMD3_HUMAN | 2  | 12.29 | 2  | 0.7091 | 0.4615 |
| Uncharacterized protein C1orf91 precursor - Homo sapiens (Human)                         | Q8WY98 CA091_HUMAN | 2  | 18.90 | 1  | 0.5966 | 0.4794 |
| Mucin-like protein 1 precursor - Homo sapiens (Human)                                    | Q96DR8 MUC1_HUMAN  | 4  | 36.67 | 1  | 0.7204 | 0.5017 |
| Phosphoinositide-3-kinase-interacting protein 1 precursor - Homo sapiens (Human)         | Q96FE7 P3IP1_HUMAN | 11 | 44.87 | 15 | 0.8136 | 0.6338 |
| Carboxypeptidase B2 precursor - Homo sapiens (Human)                                     | Q96IY4 CBPB2_HUMAN | 3  | 11.82 | 2  | 0.7055 | 0.5554 |
| Cytochrome P450 2S1 - Homo sapiens (Human)                                               | Q96SQ9 CP2S1_HUMAN | 4  | 16.87 | 1  | 0.7308 | 0.5411 |
| Endothelial protein C receptor precursor - Homo sapiens (Human)                          | Q9UNN8 EPCR_HUMAN  | 7  | 29.41 | 5  | 0.6959 | 0.4743 |
| Lymphatic vessel endothelial hyaluronic acid receptor 1 precursor - Homo sapiens (Human) | Q9Y5Y7 LYVE1_HUMAN | 2  | 11.49 | 2  | 0.8878 | 0.8567 |

**Supplementary Table 3. Supplemental documentation for peptide and protein identification in Figure 3.**

| Name                                                                     | Accession          | # unique peptides/protein | Percent Sequence coverage | # peptides used for quantitation | Protein Quantitation |        |
|--------------------------------------------------------------------------|--------------------|---------------------------|---------------------------|----------------------------------|----------------------|--------|
|                                                                          |                    |                           |                           |                                  | Mean                 | STDEV  |
| Chimeric POTE-actin protein - Homo sapiens (Human)                       | A5A3E0IPOTAC_HUMAN | 7                         | 12.84                     | 1                                | 0.5741               | 0.4935 |
| Mannan-binding lectin serine protease 2 precursor - Homo sapiens (Human) | O00187IMASP2_HUMAN | 6                         | 18.51                     | 12                               | 1.0145               | 0.4125 |
| Signal regulatory protein beta-1 precursor - Homo sapiens (Human)        | O00241ISIRB1_HUMAN | 4                         | 11.31                     | 3                                | 1.2678               | 0.6893 |
| CD5 antigen-like precursor - Homo sapiens (Human)                        | O43866ICD5L_HUMAN  | 3                         | 7.20                      | 7                                | 0.8083               | 0.6373 |
| Plexin-C1 precursor - Homo sapiens (Human)                               | O60486IPLXC1_HUMAN | 4                         | 4.66                      | 1                                | 1.3056               | 0.2235 |
| Zinc finger protein 253 - Homo sapiens (Human)                           | O75346IZN253_HUMAN | 2                         | 7.64                      | 3                                | 1.5239               | 0.7874 |
| Nucleolar protein 4 - Homo sapiens (Human)                               | O94818INOL4_HUMAN  | 4                         | 13.36                     | 1                                | 0.5508               | 0.4615 |
| Interleukin-18-binding protein precursor - Homo sapiens (Human)          | O95998II18BP_HUMAN | 3                         | 11.68                     | 6                                | 0.8372               | 0.3403 |
| Prothrombin precursor - Homo sapiens (Human)                             | P00734ITHRB_HUMAN  | 5                         | 9.32                      | 4                                | 0.8795               | 0.3526 |
| Plasminogen precursor - Homo sapiens (Human)                             | P00747IPLMN_HUMAN  | 2                         | 6.05                      | 6                                | 1.0674               | 0.9316 |
| Pepsin A precursor - Homo sapiens (Human)                                | P00790IPEPA_HUMAN  | 9                         | 17.53                     | 8                                | 0.5129               | 0.4083 |
| Alpha-1-antitrypsin precursor - Homo sapiens (Human)                     | P01009IA1AT_HUMAN  | 6                         | 13.40                     | 2                                | 0.7853               | 0.1644 |
| Alpha-1-antichymotrypsin precursor - Homo sapiens (Human)                | P01011IAACT_HUMAN  | 6                         | 9.93                      | 6                                | 0.6838               | 0.2989 |
| Kininogen-1 precursor - Homo sapiens (Human)                             | P01042IKNG1_HUMAN  | 14                        | 22.83                     | 23                               | 2.1142               | 2.2704 |
| Pro-epidermal growth factor precursor - Homo sapiens (Human)             | P01133IEGF_HUMAN   | 10                        | 15.41                     | 12                               | 0.6084               | 0.3102 |
| Thyroglobulin precursor - Homo sapiens (Human)                           | P01266ITHYG_HUMAN  | 7                         | 8.89                      | 1                                | 0.6924               | 0.2662 |
| Ig kappa chain V-III region POM - Homo sapiens (Human)                   | P01624IKV306_HUMAN | 4                         | 23.85                     | 3                                | 0.6075               | 0.3997 |
| Polymeric immunoglobulin receptor precursor - Homo sapiens (Human)       | P01833IPIGR_HUMAN  | 16                        | 23.30                     | 13                               | 0.5422               | 0.3326 |
| Ig kappa chain C region - Homo sapiens (Human)                           | P01834IKAC_HUMAN   | 4                         | 56.60                     | 12                               | 0.8129               | 0.2194 |
| Ig mu chain C region - Homo sapiens (Human)                              | P01871IMUC_HUMAN   | 9                         | 19.16                     | 11                               | 0.5959               | 0.4173 |
| Ig alpha-1 chain C region - Homo sapiens (Human)                         | P01876IIGHA1_HUMAN | 10                        | 22.95                     | 13                               | 0.5123               | 0.4090 |
| Collagen alpha-1(I) chain precursor - Homo                               | P02452ICO1A1_HUMAN | 22                        | 35.04                     | 19                               | 3.8406               | 2.2724 |

Optimizing a proteomics platform for urine biomarker discovery

|                                                                                 |                    |    |       |     |        |        |
|---------------------------------------------------------------------------------|--------------------|----|-------|-----|--------|--------|
| sapiens (Human)                                                                 |                    |    |       |     |        |        |
| Collagen alpha-1(III) chain precursor - Homo sapiens (Human)                    | P02461 CO3A1_HUMAN | 12 | 33.90 | 9   | 2.6442 | 1.2258 |
| Leucine-rich alpha-2-glycoprotein precursor - Homo sapiens (Human)              | P02750 A2GL_HUMAN  | 6  | 15.56 | 7   | 0.6707 | 0.2717 |
| Fibronectin precursor - Homo sapiens (Human)                                    | P02751 FINC_HUMAN  | 13 | 13.45 | 26  | 0.7301 | 0.4203 |
| AMBP protein precursor [Contains: Alpha-1-microglobulin - Homo sapiens (Human)] | P02760 AMBP_HUMAN  | 16 | 32.10 | 35  | 0.6960 | 0.3962 |
| Alpha-1-acid glycoprotein 1 precursor - Homo sapiens (Human)                    | P02763 A1AG1_HUMAN | 9  | 31.34 | 25  | 0.5751 | 0.3594 |
| Alpha-2-HS-glycoprotein precursor - Homo sapiens (Human)                        | P02765 FETUA_HUMAN | 6  | 15.26 | 26  | 0.8780 | 0.2921 |
| Serum albumin precursor - Homo sapiens (Human)                                  | P02768 ALBU_HUMAN  | 82 | 48.44 | 280 | 0.8906 | 0.3765 |
| Serotransferrin precursor - Homo sapiens (Human)                                | P02787 TRFE_HUMAN  | 10 | 17.77 | 6   | 0.7769 | 0.4594 |
| Ig kappa chain V-III region VG precursor - Homo sapiens (Human)                 | P04433 KV309_HUMAN | 3  | 21.74 | 1   | 0.7390 | 0.3244 |
| Alpha-amylase 1 precursor - Homo sapiens (Human)                                | P04745 AMY1_HUMAN  | 12 | 30.92 | 11  | 0.9937 | 0.3024 |
| Secretogranin-1 precursor - Homo sapiens (Human)                                | P05060 SCG1_HUMAN  | 2  | 9.16  | 3   | 1.8548 | 0.7859 |
| Apolipoprotein D precursor - Homo sapiens (Human)                               | P05090 APOD_HUMAN  | 13 | 41.80 | 57  | 1.3437 | 1.2749 |
| Plasma protease C1 inhibitor precursor - Homo sapiens (Human)                   | P05155 IC1_HUMAN   | 5  | 14.20 | 8   | 0.8189 | 0.2204 |
| Ig kappa chain V-III region IARC/BL41 precursor - Homo sapiens (Human)          | P06311 KV311_HUMAN | 4  | 23.44 | 1   | 0.6470 | 0.4023 |
| Gelsolin precursor - Homo sapiens (Human)                                       | P06396 GELS_HUMAN  | 3  | 11.76 | 2   | 0.8187 | 0.2177 |
| Protein S100-A6 - Homo sapiens (Human)                                          | P06703 S10A6_HUMAN | 2  | 25.56 | 1   | 0.9603 | 0.3174 |
| Uromodulin precursor - Homo sapiens (Human)                                     | P07911 UROM_HUMAN  | 43 | 45.00 | 95  | 0.4055 | 0.3038 |
| Ribonuclease pancreatic precursor - Homo sapiens (Human)                        | P07998 RNAS1_HUMAN | 6  | 13.46 | 19  | 0.7426 | 0.3813 |
| Collagen alpha-2(I) chain precursor - Homo sapiens (Human)                      | P08123 CO1A2_HUMAN | 12 | 24.89 | 12  | 1.6246 | 0.7952 |
| Extracellular superoxide dismutase [Cu-Zn] precursor - Homo sapiens (Human)     | P08294 SODE_HUMAN  | 3  | 18.75 | 7   | 0.7124 | 0.5610 |
| Osteopontin precursor - Homo sapiens (Human)                                    | P10451 OSTP_HUMAN  | 13 | 31.85 | 65  | 1.9334 | 1.1313 |
| Chromogranin-A precursor - Homo sapiens (Human)                                 | P10645 CMGA_HUMAN  | 3  | 6.13  | 5   | 0.6684 | 0.4773 |



Optimizing a proteomics platform for urine biomarker discovery

|                                                                                                |                    |    |       |    |        |        |
|------------------------------------------------------------------------------------------------|--------------------|----|-------|----|--------|--------|
| Dystrophin - Homo sapiens (Human)                                                              | P11532 DMD_HUMAN   | 8  | 3.69  | 1  | 0.6054 | 0.4937 |
| Collagen alpha-1(VI) chain precursor - Homo sapiens (Human)                                    | P12109 CO6A1_HUMAN | 3  | 13.42 | 7  | 1.4931 | 0.9833 |
| Neural cell adhesion molecule 1, 140 kDa isoform precursor - Homo sapiens (Human)              | P13591 NCA11_HUMAN | 6  | 7.78  | 4  | 0.7418 | 0.5346 |
| CD59 glycoprotein precursor - Homo sapiens (Human)                                             | P13987 CD59_HUMAN  | 9  | 20.31 | 59 | 2.6159 | 1.0647 |
| CD99 antigen precursor - Homo sapiens (Human)                                                  | P14209 CD99_HUMAN  | 7  | 41.08 | 17 | 1.3624 | 1.0662 |
| Nidogen-1 precursor - Homo sapiens (Human)                                                     | P14543 NID1_HUMAN  | 5  | 8.90  | 3  | 0.8738 | 0.3184 |
| Aminopeptidase N - Homo sapiens (Human)                                                        | P15144 AMPN_HUMAN  | 6  | 8.48  | 1  | 0.9140 | 0.4352 |
| Poliovirus receptor precursor - Homo sapiens (Human)                                           | P15151 PVR_HUMAN   | 3  | 8.87  | 1  | 0.7817 | 0.2185 |
| Folate receptor alpha precursor - Homo sapiens (Human)                                         | P15328 FOLR1_HUMAN | 2  | 21.79 | 7  | 0.7749 | 0.3742 |
| Immunoglobulin lambda-like polypeptide 1 precursor - Homo sapiens (Human)                      | P15814 IGLL1_HUMAN | 3  | 24.41 | 1  | 0.9607 | 0.3297 |
| CD44 antigen precursor - Homo sapiens (Human)                                                  | P16070 CD44_HUMAN  | 2  | 7.14  | 5  | 0.4151 | 0.3497 |
| Prolactin receptor precursor - Homo sapiens (Human)                                            | P16471 PRLR_HUMAN  | 2  | 8.04  | 1  | 0.7634 | 0.3142 |
| Ig kappa chain V-III region HIC precursor - Homo sapiens (Human)                               | P18136 KV313_HUMAN | 4  | 20.16 | 7  | 0.5312 | 0.2887 |
| Integrin alpha-X precursor - Homo sapiens (Human)                                              | P20702 ITAX_HUMAN  | 7  | 11.18 | 2  | 1.4642 | 0.6674 |
| Sarcoplasmic reticulum histidine-rich calcium-binding protein precursor - Homo sapiens (Human) | P23327 SRCH_HUMAN  | 2  | 9.59  | 6  | 1.3477 | 0.3673 |
| Zinc-alpha-2-glycoprotein precursor - Homo sapiens (Human)                                     | P25311 ZA2G_HUMAN  | 11 | 34.58 | 11 | 0.9928 | 0.0669 |
| CD27 antigen precursor - Homo sapiens (Human)                                                  | P26842 CD27_HUMAN  | 2  | 10.38 | 8  | 0.8257 | 0.5533 |
| Tyrosine-protein kinase receptor UFO precursor - Homo sapiens (Human)                          | P30530 UFO_HUMAN   | 6  | 14.32 | 14 | 0.5648 | 0.3837 |
| Sodium/glucose cotransporter 2 - Homo sapiens (Human)                                          | P31639 SC5A2_HUMAN | 5  | 11.61 | 5  | 0.7176 | 0.2480 |
| N-acetylgalactosamine-6-sulfatase precursor - Homo sapiens (Human)                             | P34059 GALNS_HUMAN | 5  | 12.64 | 1  | 1.4660 | 0.5511 |
| Trypsin-3 precursor - Homo sapiens (Human)                                                     | P35030 TRY3_HUMAN  | 6  | 17.76 | 3  | 0.4715 | 0.3862 |
| Fibrillin-1 precursor - Homo sapiens (Human)                                                   | P35555 FBN1_HUMAN  | 15 | 13.51 | 2  | 1.1303 | 0.1250 |
| Collagen alpha-1(XVIII) chain precursor [Contains: Endostatin] - Homo sapiens (Human)          | P39060 CO1A1_HUMAN | 7  | 13.34 | 3  | 1.4725 | 0.3654 |

Optimizing a proteomics platform for urine biomarker discovery

|                                                                                                       |                     |    |       |    |        |        |
|-------------------------------------------------------------------------------------------------------|---------------------|----|-------|----|--------|--------|
| Prostaglandin-H2 D-isomerase precursor - Homo sapiens (Human)                                         | P41222 PTGDS_HUMAN  | 12 | 33.68 | 15 | 0.4274 | 0.4084 |
| Signal transducer and activator of transcription 1-alpha/beta - Homo sapiens (Human)                  | P42224 STAT1_HUMAN  | 2  | 4.13  | 1  | 1.6411 | 1.4152 |
| RNA-binding protein 5 - Homo sapiens (Human)                                                          | P52756 RBM5_HUMAN   | 4  | 5.52  | 5  | 0.4177 | 0.4563 |
| Alpha-N-acetylglucosaminidase precursor - Homo sapiens (Human)                                        | P54802 ANAG_HUMAN   | 6  | 10.90 | 10 | 0.5985 | 0.3479 |
| Cadherin-13 precursor - Homo sapiens (Human)                                                          | P55290 CAD13_HUMAN  | 4  | 10.24 | 24 | 0.7950 | 0.5311 |
| Epiplakin - Homo sapiens (Human)                                                                      | P58107 EPIPL_HUMAN  | 11 | 17.79 | 2  | 0.7376 | 0.3600 |
| Beta-defensin 1 precursor - Homo sapiens (Human)                                                      | P60022 BD01_HUMAN   | 7  | 36.76 | 38 | 0.8866 | 0.7611 |
| HERV-K_12q14.1 provirus ancestral Env polyprotein precursor - Homo sapiens (Human)                    | P61565 ENK1_HUMAN   | 7  | 8.60  | 1  | 0.8108 | 0.2430 |
| Beta-2-microglobulin precursor [Contains: Beta-2-microglobulin form pI 5.3] - Homo sapiens (Human)    | P61769 B2MG_HUMAN   | 6  | 39.50 | 21 | 0.8254 | 0.5200 |
| Nuclear transport factor 2 - Homo sapiens (Human)                                                     | P61970 NTF2_HUMAN   | 2  | 7.09  | 1  | 1.1642 | 0.9635 |
| Ubiquitin - Homo sapiens (Human)                                                                      | P62988 UBIQ_HUMAN   | 3  | 25.00 | 2  | 0.9675 | 0.2030 |
| Hemoglobin subunit beta - Homo sapiens (Human)                                                        | P68871 HBB_HUMAN    | 2  | 17.69 | 1  | 0.9250 | 0.5832 |
| Tyrosine-protein phosphatase non-receptor type substrate 1 precursor - Homo sapiens (Human)           | P78324 SHPS1_HUMAN  | 9  | 18.89 | 10 | 2.2192 | 1.2737 |
| DNA-dependent protein kinase catalytic subunit - Homo sapiens (Human)                                 | P78527 PRKDC_HUMAN  | 13 | 5.43  | 2  | 0.5153 | 0.4160 |
| Basement membrane-specific heparan sulfate proteoglycan core protein precursor - Homo sapiens (Human) | P98160 PGBM_HUMAN   | 45 | 26.62 | 46 | 0.6025 | 0.3118 |
| Amyloid-like protein 2 precursor - Homo sapiens (Human)                                               | Q06481 APLP2_HUMAN  | 3  | 8.13  | 1  | 1.3289 | 0.4979 |
| Galectin-3-binding protein precursor - Homo sapiens (Human)                                           | Q08380 LG3BP_HUMAN  | 10 | 15.73 | 6  | 0.6907 | 0.2662 |
| Nucleosome-remodeling factor subunit BPTF - Homo sapiens (Human)                                      | Q12830 BPTF_HUMAN   | 12 | 7.09  | 1  | 0.8799 | 0.3920 |
| Vesicular integral-membrane protein VIP36 precursor - Homo sapiens (Human)                            | Q12907 ILMAN2_HUMAN | 5  | 17.42 | 5  | 0.4346 | 0.3717 |
| Interleukin-15 receptor alpha chain precursor - Homo sapiens (Human)                                  | Q13261 IL15RA_HUMAN | 2  | 8.24  | 1  | 0.8169 | 0.1781 |
| Protein unc-119 homolog - Homo sapiens (Human)                                                        | Q13432 UN119_HUMAN  | 2  | 7.92  | 2  | 1.5794 | 0.5094 |

Optimizing a proteomics platform for urine biomarker discovery

|                                                                                                                          |                     |    |       |    |        |        |
|--------------------------------------------------------------------------------------------------------------------------|---------------------|----|-------|----|--------|--------|
| Acid ceramidase precursor - Homo sapiens (Human)                                                                         | Q13510 ASAHI_HUMAN  | 3  | 5.57  | 2  | 1.2691 | 0.6306 |
| Integrin alpha-7 precursor [Contains: Integrin alpha-7 heavy chain; Integrin alpha-7 light chain] - Homo sapiens (Human) | Q13683 ITA7_HUMAN   | 3  | 7.71  | 7  | 1.6204 | 0.7788 |
| Dystroglycan precursor - Homo sapiens (Human)                                                                            | Q14118 DAG1_HUMAN   | 2  | 8.04  | 6  | 1.1645 | 0.1631 |
| Uncharacterized protein KIAA0133 - Homo sapiens (Human)                                                                  | Q14146 K0133_HUMAN  | 8  | 6.30  | 1  | 1.2578 | 0.3119 |
| Protein FAM53B - Homo sapiens (Human)                                                                                    | Q14153 FA53B_HUMAN  | 2  | 19.91 | 2  | 0.4316 | 0.3799 |
| RNA-binding protein 39 - Homo sapiens (Human)                                                                            | Q14498 IRBM39_HUMAN | 2  | 5.66  | 1  | 0.7283 | 0.1911 |
| Inositol 1,4,5-trisphosphate receptor type 2 - Homo sapiens (Human)                                                      | Q14571 ITPR2_HUMAN  | 13 | 7.11  | 2  | 0.5096 | 0.3744 |
| 59 kDa 2'-5'-oligoadenylate synthetase-like protein - Homo sapiens (Human)                                               | Q15646 OASL_HUMAN   | 8  | 12.45 | 2  | 1.0017 | 0.1666 |
| Zinc finger protein ZXDC - Homo sapiens (Human)                                                                          | Q2QGD7 ZXDC_HUMAN   | 2  | 8.28  | 1  | 1.3793 | 0.6806 |
| Autophagy-related protein 2 homolog A - Homo sapiens (Human)                                                             | Q2TAZ0 ATG2A_HUMAN  | 15 | 9.86  | 3  | 0.4111 | 0.3438 |
| Vacuolar protein sorting-associated protein 13D - Homo sapiens (Human)                                                   | Q5THJ4 VP13D_HUMAN  | 22 | 8.34  | 1  | 0.9206 | 0.4699 |
| cAMP responsive element-binding protein 3-like protein 3 - Homo sapiens (Human)                                          | Q68CJ9 CR3L3_HUMAN  | 2  | 7.81  | 3  | 0.6413 | 0.3451 |
| Vasorin precursor - Homo sapiens (Human)                                                                                 | Q6EMK4 VASN_HUMAN   | 13 | 31.20 | 5  | 0.6127 | 0.2925 |
| Leukocyte-associated immunoglobulin-like receptor 1 precursor - Homo sapiens (Human)                                     | Q6GTX8 LAIR1_HUMAN  | 6  | 34.49 | 15 | 2.0005 | 0.7397 |
| Nuclear factor related to kappa-B-binding protein - Homo sapiens (Human)                                                 | Q6P4R8 NFRKB_HUMAN  | 4  | 9.24  | 1  | 0.9417 | 0.9056 |
| Biogenesis of lysosome-related organelles complex-1 subunit 3 - Homo sapiens (Human)                                     | Q6QNY0 BL1S3_HUMAN  | 2  | 8.42  | 3  | 0.3754 | 0.3494 |
| CMRF35-like molecule 9 precursor - Homo sapiens (Human)                                                                  | Q6UXG3 CLM9_HUMAN   | 5  | 11.75 | 7  | 0.9529 | 0.3042 |
| Rab11 family-interacting protein 1 - Homo sapiens (Human)                                                                | Q6WKZ4 RFIP1_HUMAN  | 4  | 7.09  | 2  | 0.6900 | 0.4737 |
| Putative membrane protein C11orf41 - Homo sapiens (Human)                                                                | Q6ZVL6 ICK041_HUMAN | 5  | 9.47  | 1  | 2.1167 | 0.6932 |
| Vitelline membrane outer layer protein 1 homolog precursor - Homo sapiens (Human)                                        | Q7Z5L0 VMO1_HUMAN   | 7  | 30.20 | 19 | 1.1134 | 0.5957 |
| Protein FAM90A1 - Homo sapiens (Human)                                                                                   | Q86YD7 F90A1_HUMAN  | 4  | 5.82  | 1  | 0.3595 | 0.4851 |

Optimizing a proteomics platform for urine biomarker discovery

|                                                                                              |                     |     |       |    |        |        |
|----------------------------------------------------------------------------------------------|---------------------|-----|-------|----|--------|--------|
| Mediator of RNA polymerase II transcription subunit 12-like protein - Homo sapiens (Human)   | Q86YW9 MD12L_HUMAN  | 6   | 6.25  | 1  | 1.5846 | 1.2690 |
| Neuron navigator 2 - Homo sapiens (Human)                                                    | Q8IVL1 NAV2_HUMAN   | 11  | 7.88  | 2  | 0.8200 | 0.7014 |
| Extracellular sulfatase Sulf-2 precursor - Homo sapiens (Human)                              | Q8IWU5 SULF2_HUMAN  | 7   | 8.39  | 23 | 1.7574 | 1.7466 |
| Transmembrane protein 61 - Homo sapiens (Human)                                              | Q8N0U2 TMM61_HUMAN  | 3   | 10.00 | 1  | 0.7634 | 0.3312 |
| Armadillo repeat-containing protein 10 - Homo sapiens (Human)                                | Q8N2F6 ARM10_HUMAN  | 2   | 7.29  | 2  | 1.1717 | 0.2705 |
| Leukocyte immunoglobulin-like receptor subfamily B member 2 precursor - Homo sapiens (Human) | Q8N423 LIRB2_HUMAN  | 4   | 8.03  | 2  | 0.7396 | 0.1565 |
| Golgi membrane protein 1 - Homo sapiens (Human)                                              | Q8NBJ4 GOLM1_HUMAN  | 2   | 7.73  | 6  | 0.8847 | 0.2035 |
| Zinc transporter 5 - Homo sapiens (Human)                                                    | Q8TAD4 ZNT5_HUMAN   | 5   | 7.32  | 1  | 1.7616 | 0.7301 |
| Neighbor of punc e11 precursor - Homo sapiens (Human)                                        | Q8TDY8 NOPE_HUMAN   | 5   | 8.96  | 1  | 0.8931 | 1.0067 |
| Leucine-rich repeat-containing protein 15 precursor - Homo sapiens (Human)                   | Q8TF66 LRC15_HUMAN  | 5   | 8.61  | 1  | 1.1509 | 0.5627 |
| Secreted and transmembrane protein 1 precursor - Homo sapiens (Human)                        | Q8WVN6 SCTM1_HUMAN  | 2   | 14.52 | 3  | 1.0412 | 0.3276 |
| Kelch repeat and BTB domain-containing protein 7 - Homo sapiens (Human)                      | Q8WVZ9 KBTB7_HUMAN  | 2   | 6.87  | 1  | 0.6227 | 0.4524 |
| Mucin-16 - Homo sapiens (Human)                                                              | Q8WXI7 MUC16_HUMAN  | 48  | 13.31 | 4  | 0.8753 | 0.1729 |
| Titin - Homo sapiens (Human)                                                                 | Q8WZ42 TITIN_HUMAN  | 105 | 10.75 | 16 | 0.9514 | 0.4318 |
| Roundabout homolog 4 precursor - Homo sapiens (Human)                                        | Q8WZ75 ROBO4_HUMAN  | 15  | 20.75 | 15 | 0.9157 | 0.4382 |
| Mucin-like protein 1 precursor - Homo sapiens (Human)                                        | Q96DR8 MUCL1_HUMAN  | 2   | 24.44 | 2  | 0.8970 | 0.0737 |
| Phosphoinositide-3-kinase-interacting protein 1 precursor - Homo sapiens (Human)             | Q96FE7 IP3IP1_HUMAN | 6   | 39.16 | 18 | 1.0253 | 0.7936 |
| Uncharacterized protein C17orf37 - Homo sapiens (Human)                                      | Q9BRT3 CQ037_HUMAN  | 2   | 35.65 | 1  | 0.8518 | 0.4682 |
| Nucleolar complex protein 4 homolog - Homo sapiens (Human)                                   | Q9BVI4 NOC4L_HUMAN  | 12  | 8.14  | 4  | 0.6621 | 0.4165 |
| Transmembrane protease, serine 13 - Homo sapiens (Human)                                     | Q9BYE2 TMPSD_HUMAN  | 3   | 19.79 | 3  | 1.1308 | 0.3187 |
| Zinc finger protein 436 - Homo sapiens (Human)                                               | Q9C0F3 ZN436_HUMAN  | 4   | 10.43 | 2  | 0.7783 | 0.7098 |

## Optimizing a proteomics platform for urine biomarker discovery

|                                                                                  |                    |   |       |    |        |        |
|----------------------------------------------------------------------------------|--------------------|---|-------|----|--------|--------|
| Protein YIPF3 - Homo sapiens (Human)                                             | Q9GZM5 YIPF3_HUMAN | 6 | 9.71  | 21 | 1.2596 | 0.9268 |
| Protein Wnt-8a precursor - Homo sapiens (Human)                                  | Q9H1J5 WNT8A_HUMAN | 5 | 9.01  | 3  | 1.1168 | 0.4559 |
| SH3 domain-binding glutamic acid-rich-like protein 3 - Homo sapiens (Human)      | Q9H299 SH3L3_HUMAN | 2 | 27.96 | 1  | 0.6415 | 0.2533 |
| Endosialin precursor - Homo sapiens (Human)                                      | Q9HCU0 CD248_HUMAN | 5 | 12.81 | 1  | 0.7605 | 0.4098 |
| Cell death regulator Aven - Homo sapiens (Human)                                 | Q9NQS1 AVEN_HUMAN  | 2 | 7.46  | 2  | 1.2533 | 0.3901 |
| Transmembrane protein 34 - Homo sapiens (Human)                                  | Q9NVA4 TMM34_HUMAN | 3 | 11.87 | 1  | 1.0725 | 0.3727 |
| Voltage-dependent T-type calcium channel subunit alpha-1I - Homo sapiens (Human) | Q9P0X4 CAC1I_HUMAN | 7 | 5.85  | 1  | 1.0995 | 0.4758 |
| Cingulin - Homo sapiens (Human)                                                  | Q9P2M7 CING_HUMAN  | 2 | 4.18  | 5  | 1.5180 | 0.8285 |
| RNA-binding protein 27 - Homo sapiens (Human)                                    | Q9P2N5 RBM27_HUMAN | 3 | 10.00 | 1  | 0.5983 | 0.2932 |
| ADAMTS-7 precursor - Homo sapiens (Human)                                        | Q9UKP4 ATS7_HUMAN  | 4 | 8.63  | 2  | 0.9044 | 0.4536 |
| Protein HEG homolog 1 precursor - Homo sapiens (Human)                           | Q9ULI3 HEG1_HUMAN  | 6 | 11.73 | 4  | 1.0205 | 0.5498 |
| Neurogenic locus notch homolog protein 3 precursor - Homo sapiens (Human)        | Q9UM47 NOTC3_HUMAN | 7 | 8.70  | 2  | 0.7233 | 0.3875 |
| Tyrosine-protein phosphatase non-receptor type 22 - Homo sapiens (Human)         | Q9Y2R2 PTN22_HUMAN | 7 | 8.30  | 1  | 0.5587 | 0.2921 |
| Neurexin-3-alpha precursor - Homo sapiens (Human)                                | Q9Y4C0 NRX3A_HUMAN | 6 | 7.49  | 2  | 0.9212 | 0.7591 |
| Coatomer subunit gamma - Homo sapiens (Human)                                    | Q9Y678 COPG_HUMAN  | 2 | 5.95  | 1  | 1.0301 | 0.4198 |

**Supplementary Table 4a. Supplemental documentation for peptide and protein identification for the normoalbuminuric sample in Figure 4.**

| Name                                                                                 | Accession          | # unique peptides/protein | Percent Sequence coverage | # peptides used for quantitation | Protein Quantitation |         |
|--------------------------------------------------------------------------------------|--------------------|---------------------------|---------------------------|----------------------------------|----------------------|---------|
|                                                                                      |                    |                           |                           |                                  | Mean                 | STDEV   |
| CD5 antigen-like precursor - Homo sapiens (Human)                                    | O43866 CD5L_HUMAN  | 2                         | 7.49                      | 1                                | 2.3768               | 1.6672  |
| Ceruloplasmin precursor - Homo sapiens (Human)                                       | P00450 CERU_HUMAN  | 5                         | 14.37                     | 5                                | 0.6548               | 0.6704  |
| Coagulation factor IX precursor - Homo sapiens (Human)                               | P00740 FA9_HUMAN   | 2                         | 12.15                     | 4                                | 10.2044              | 10.2939 |
| Complement factor B precursor - Homo sapiens (Human)                                 | P00751 CFAB_HUMAN  | 5                         | 13.09                     | 2                                | 0.7456               | 0.2963  |
| Alpha-1-antitrypsin precursor - Homo sapiens (Human)                                 | P01009 A1AT_HUMAN  | 5                         | 20.81                     | 4                                | 0.5840               | 0.4892  |
| Kininogen-1 precursor - Homo sapiens (Human)                                         | P01042 KNG1_HUMAN  | 9                         | 22.05                     | 6                                | 0.9027               | 0.1490  |
| Polymeric immunoglobulin receptor precursor - Homo sapiens (Human)                   | P01833 PIGR_HUMAN  | 6                         | 24.35                     | 10                               | 0.8152               | 0.6426  |
| Ig kappa chain C region - Homo sapiens (Human)                                       | P01834 KAC_HUMAN   | 15                        | 90.57                     | 27                               | 0.5172               | 0.3885  |
| Ig lambda chain C regions - Homo sapiens (Human)                                     | P01842 LAC_HUMAN   | 11                        | 78.10                     | 14                               | 0.4907               | 0.4832  |
| Ig gamma-1 chain C region - Homo sapiens (Human)                                     | P01857 IGHG1_HUMAN | 12                        | 60.91                     | 1                                | 1.2564               | 0.7088  |
| Ig gamma-2 chain C region - Homo sapiens (Human)                                     | P01859 IGHG2_HUMAN | 12                        | 55.83                     | 6                                | 1.3008               | 1.6352  |
| Ig gamma-3 chain C region - Homo sapiens (Human)                                     | P01860 IGHG3_HUMAN | 9                         | 37.93                     | 4                                | 1.5458               | 0.6958  |
| Ig alpha-2 chain C region - Homo sapiens (Human)                                     | P01877 IGHA2_HUMAN | 13                        | 57.65                     | 11                               | 1.0337               | 1.2273  |
| Collagen alpha-1(I) chain precursor - Homo sapiens (Human)                           | P02452 CO1A1_HUMAN | 49                        | 59.02                     | 27                               | 22.2894              | 25.5455 |
| Collagen alpha-1(III) chain precursor - Homo sapiens (Human)                         | P02461 CO3A1_HUMAN | 34                        | 58.12                     | 25                               | 15.6903              | 16.4696 |
| Fibrinogen alpha chain precursor [Contains: Fibrinopeptide A] - Homo sapiens (Human) | P02671 FIBA_HUMAN  | 5                         | 25.64                     | 4                                | 0.9415               | 0.2285  |
| Leucine-rich alpha-2-glycoprotein precursor - Homo sapiens (Human)                   | P02750 A2GL_HUMAN  | 3                         | 24.50                     | 5                                | 0.8012               | 0.6635  |
| Fibronectin precursor - Homo sapiens (Human)                                         | P02751 FINC_HUMAN  | 7                         | 23.26                     | 8                                | 0.6258               | 0.3476  |

Optimizing a proteomics platform for urine biomarker discovery

|                                                                                  |                    |     |       |     |         |         |
|----------------------------------------------------------------------------------|--------------------|-----|-------|-----|---------|---------|
| AMBP protein precursor [Contains: Alpha-1-microglobulin - Homo sapiens (Human)]  | P02760 AMBP_HUMAN  | 43  | 72.44 | 96  | 0.7050  | 0.4987  |
| Alpha-1-acid glycoprotein 1 precursor - Homo sapiens (Human)                     | P02763 A1AG1_HUMAN | 47  | 82.09 | 32  | 0.2974  | 0.3498  |
| Alpha-2-HS-glycoprotein precursor - Homo sapiens (Human)                         | P02765 FETUA_HUMAN | 10  | 38.96 | 17  | 0.4833  | 0.2762  |
| Serum albumin precursor - Homo sapiens (Human)                                   | P02768 ALBU_HUMAN  | 134 | 79.64 | 312 | 1.2364  | 0.4843  |
| Vitamin D-binding protein precursor - Homo sapiens (Human)                       | P02774 VTDB_HUMAN  | 4   | 14.77 | 2   | 0.6097  | 0.2563  |
| Serotransferrin precursor - Homo sapiens (Human)                                 | P02787 TRFE_HUMAN  | 54  | 58.88 | 106 | 0.3846  | 0.4054  |
| Hemopexin precursor - Homo sapiens (Human)                                       | P02790 HEMO_HUMAN  | 5   | 22.29 | 5   | 0.4515  | 0.4406  |
| Salivary acidic proline-rich phosphoprotein 1/2 precursor - Homo sapiens (Human) | P02810 PRPC_HUMAN  | 5   | 43.37 | 2   | 3.9405  | 4.5624  |
| Coagulation factor XI precursor - Homo sapiens (Human)                           | P03951 FA11_HUMAN  | 2   | 14.08 | 1   | 3.0568  | 2.7119  |
| Vitamin K-dependent protein C precursor - Homo sapiens (Human)                   | P04070 PROC_HUMAN  | 2   | 3.90  | 1   | 4.1303  | 3.6513  |
| N-myc proto-oncogene protein - Homo sapiens (Human)                              | P04198 MYCN_HUMAN  | 4   | 19.40 | 1   | 2.2358  | 1.7009  |
| Alpha-1B-glycoprotein precursor - Homo sapiens (Human)                           | P04217 A1BG_HUMAN  | 13  | 34.75 | 17  | 0.3820  | 0.4083  |
| Ig kappa chain V-III region VG precursor - Homo sapiens (Human)                  | P04433 KV309_HUMAN | 9   | 60.00 | 3   | 1.2105  | 0.2963  |
| Ig kappa chain V-III region VH precursor - Homo sapiens (Human)                  | P04434 KV310_HUMAN | 6   | 37.93 | 4   | 0.6727  | 0.6522  |
| Apolipoprotein D precursor - Homo sapiens (Human)                                | P05090 APOD_HUMAN  | 2   | 23.28 | 4   | 3.7968  | 3.3652  |
| Ig kappa chain V-II region GM607 precursor - Homo sapiens (Human)                | P06309 KV205_HUMAN | 4   | 59.83 | 3   | 0.6165  | 0.3582  |
| Trypsin-1 precursor - Homo sapiens (Human)                                       | P07477 TRY1_HUMAN  | 10  | 34.01 | 3   | 1.5308  | 0.7555  |
| Uromodulin precursor - Homo sapiens (Human)                                      | P07911 UROM_HUMAN  | 11  | 33.28 | 17  | 5.3829  | 4.6814  |
| Collagen alpha-2(I) chain precursor - Homo sapiens (Human)                       | P08123 CO1A2_HUMAN | 23  | 61.35 | 8   | 10.0934 | 10.1964 |
| Non-secretory ribonuclease precursor - Homo sapiens (Human)                      | P10153 RNAS2_HUMAN | 2   | 25.47 | 1   | 1.1506  | 0.6308  |
| Osteopontin precursor - Homo sapiens (Human)                                     | P10451 OSTP_HUMAN  | 7   | 26.43 | 7   | 2.4583  | 1.8042  |
| DNA topoisomerase 2-alpha - Homo sapiens (Human)                                 | P11388 TOP2A_HUMAN | 8   | 11.10 | 3   | 0.9662  | 0.1808  |

Optimizing a proteomics platform for urine biomarker discovery

|                                                                                                       |                    |    |       |    |         |         |
|-------------------------------------------------------------------------------------------------------|--------------------|----|-------|----|---------|---------|
| CD59 glycoprotein precursor - Homo sapiens (Human)                                                    | P13987 CD59_HUMAN  | 12 | 44.53 | 23 | 0.4061  | 0.3738  |
| Ig kappa chain V-III region HAH precursor - Homo sapiens (Human)                                      | P18135 KV312_HUMAN | 11 | 79.07 | 5  | 0.5060  | 0.4501  |
| Protein-glutamine gamma-glutamyltransferase 2 - Homo sapiens (Human)                                  | P21980 TGM2_HUMAN  | 2  | 13.68 | 2  | 5.6083  | 3.6469  |
| Tenascin-X precursor - Homo sapiens (Human)                                                           | P22105 TENX_HUMAN  | 18 | 35.35 | 6  | 0.6062  | 0.2353  |
| Zinc-alpha-2-glycoprotein precursor - Homo sapiens (Human)                                            | P25311 ZA2G_HUMAN  | 35 | 74.92 | 47 | 0.4009  | 0.4937  |
| CD27 antigen precursor - Homo sapiens (Human)                                                         | P26842 CD27_HUMAN  | 4  | 28.08 | 7  | 0.4753  | 0.3195  |
| Prostaglandin-H2 D-isomerase precursor - Homo sapiens (Human)                                         | P41222 PTGDS_HUMAN | 16 | 70.53 | 32 | 0.6325  | 0.3940  |
| Afamin precursor - Homo sapiens (Human)                                                               | P43652 AFAM_HUMAN  | 7  | 12.35 | 4  | 0.5021  | 0.2847  |
| Dipeptidyl-peptidase 1 precursor - Homo sapiens (Human)                                               | P53634 CATC_HUMAN  | 3  | 11.88 | 2  | 0.4449  | 0.4193  |
| Cadherin-13 precursor - Homo sapiens (Human)                                                          | P55290 CAD13_HUMAN | 2  | 15.71 | 2  | 0.4508  | 0.3496  |
| Beta-defensin 1 precursor - Homo sapiens (Human)                                                      | P60022 BD01_HUMAN  | 2  | 14.71 | 5  | 14.4523 | 14.4059 |
| HERV-K_12q14.1 provirus ancestral Env polyprotein precursor - Homo sapiens (Human)                    | P61565 ENK1_HUMAN  | 6  | 17.34 | 3  | 5.2901  | 5.3305  |
| Beta-2-microglobulin precursor [Contains: Beta-2-microglobulin form pI 5.3] - Homo sapiens (Human)    | P61769 B2MG_HUMAN  | 3  | 30.25 | 7  | 0.4366  | 0.3653  |
| Basement membrane-specific heparan sulfate proteoglycan core protein precursor - Homo sapiens (Human) | P98160 PGBM_HUMAN  | 32 | 31.25 | 15 | 1.5134  | 1.0443  |
| RNA-binding protein 10 - Homo sapiens (Human)                                                         | P98175 RBM10_HUMAN | 2  | 16.36 | 1  | 17.5714 | 23.8619 |
| WAP four-disulfide core domain protein 2 precursor - Homo sapiens (Human)                             | Q14508 WFDC2_HUMAN | 3  | 25.81 | 3  | 0.5612  | 0.3829  |
| Inositol 1,4,5-trisphosphate receptor type 2 - Homo sapiens (Human)                                   | Q14571 ITPR2_HUMAN | 9  | 11.77 | 4  | 0.4178  | 0.3743  |
| Inter-alpha-trypsin inhibitor heavy chain H4 precursor - Homo sapiens (Human)                         | Q14624 ITI4_HUMAN  | 4  | 23.76 | 6  | 0.8032  | 0.1376  |
| Condensin complex subunit 1 - Homo sapiens (Human)                                                    | Q15021 CND1_HUMAN  | 5  | 14.13 | 1  | 1.7983  | 1.2062  |
| Myosin light chain kinase, smooth muscle - Homo sapiens (Human)                                       | Q15746 MYLK_HUMAN  | 5  | 16.30 | 4  | 1.3369  | 0.7073  |
| Plasma membrane calcium-transporting ATPase 3                                                         | Q16720 AT2B3_HUMAN | 3  | 9.75  | 1  | 1.3573  | 1.1261  |



Optimizing a proteomics platform for urine biomarker discovery

|                                                                                            |                     |    |       |    |         |         |
|--------------------------------------------------------------------------------------------|---------------------|----|-------|----|---------|---------|
| - Homo sapiens (Human)                                                                     |                     |    |       |    |         |         |
| Solute carrier family 22 member 10 - Homo sapiens (Human)                                  | Q63ZE4 OAT5_HUMAN   | 5  | 7.16  | 3  | 1.4802  | 1.8756  |
| Leukocyte-associated immunoglobulin-like receptor 1 precursor - Homo sapiens (Human)       | Q6GTX8 LAIR1_HUMAN  | 4  | 28.22 | 4  | 1.1948  | 0.5583  |
| Sodium/potassium/calcium exchanger 6 precursor - Homo sapiens (Human)                      | Q6J4K2 NCKX6_HUMAN  | 7  | 24.49 | 1  | 1.3481  | 1.0028  |
| Prickle-like protein 2 - Homo sapiens (Human)                                              | Q7Z3G6 PRIC2_HUMAN  | 2  | 11.97 | 1  | 2.2068  | 1.8031  |
| Mediator of RNA polymerase II transcription subunit 12-like protein - Homo sapiens (Human) | Q86YW9 MD12L_HUMAN  | 9  | 10.91 | 2  | 1.1428  | 1.2116  |
| Extracellular sulfatase Sulf-2 precursor - Homo sapiens (Human)                            | Q8IWU5 SULF2_HUMAN  | 3  | 15.86 | 4  | 6.7490  | 6.4988  |
| Integrator complex subunit 1 - Homo sapiens (Human)                                        | Q8N201 INT1_HUMAN   | 8  | 11.00 | 1  | 0.9065  | 0.1654  |
| Sugar phosphate exchanger 3 - Homo sapiens (Human)                                         | Q8NCC5 SPX3_HUMAN   | 5  | 12.96 | 2  | 1.2761  | 0.3520  |
| Mucin-16 - Homo sapiens (Human)                                                            | Q8WXI7 MUC16_HUMAN  | 48 | 21.02 | 13 | 3.0541  | 2.6200  |
| Titin - Homo sapiens (Human)                                                               | Q8WZ42 TITIN_HUMAN  | 75 | 21.27 | 30 | 1.0928  | 0.6323  |
| GCN1-like protein 1 - Homo sapiens (Human)                                                 | Q92616 GCN1L_HUMAN  | 11 | 13.93 | 5  | 1.4378  | 1.9322  |
| Phosphoinositide-3-kinase-interacting protein 1 precursor - Homo sapiens (Human)           | Q96FE7 P3IP1_HUMAN  | 7  | 34.60 | 13 | 11.4718 | 12.8394 |
| Ciliary dynein heavy chain 8 - Homo sapiens (Human)                                        | Q96JB1 DYH8_HUMAN   | 17 | 12.61 | 2  | 1.4166  | 0.4997  |
| Cytochrome P450 2S1 - Homo sapiens (Human)                                                 | Q96SQ9 CP2S1_HUMAN  | 8  | 22.62 | 4  | 7.1190  | 7.4194  |
| Protein YIPF3 - Homo sapiens (Human)                                                       | Q9GZM5 YIPF3_HUMAN  | 3  | 19.43 | 2  | 6.3684  | 7.4174  |
| p53-regulated apoptosis-inducing protein 1 - Homo sapiens (Human)                          | Q9HCN2 TPIP1_HUMAN  | 2  | 8.06  | 1  | 2.7358  | 1.3593  |
| Kinesin-like protein KIF13B - Homo sapiens (Human)                                         | Q9NQT8 KIF13B_HUMAN | 7  | 13.86 | 2  | 1.2290  | 0.6060  |
| Sex comb on midleg-like protein 1 - Homo sapiens (Human)                                   | Q9UN30 SCML1_HUMAN  | 2  | 8.65  | 1  | 5.5516  | 4.2615  |
| Kallikrein-5 precursor - Homo sapiens (Human)                                              | Q9Y337 KLK5_HUMAN   | 9  | 37.88 | 3  | 5.6550  | 3.5598  |

**Supplementary Table 4b. Supplemental documentation for peptide and protein identification for the macroalbuminuric sample in Figure 4.**

| Name                                                                         | Accession          | # unique peptides/protein | Percent Sequence coverage | # peptides used for quantitation | Protein Quantitation |        |
|------------------------------------------------------------------------------|--------------------|---------------------------|---------------------------|----------------------------------|----------------------|--------|
|                                                                              |                    |                           |                           |                                  | Mean                 | STDEV  |
| CD5 antigen-like precursor - Homo sapiens                                    | O43866 CD5L_HUMAN  | 2                         | 7.49                      | 1                                | 0.2628               | 0.1096 |
| Ceruloplasmin precursor - Homo sapiens                                       | P00450 CERU_HUMAN  | 5                         | 14.37                     | 5                                | 14.1005              | 3.6376 |
| Coagulation factor IX precursor - Homo sapiens                               | P00740 FA9_HUMAN   | 2                         | 12.15                     | 4                                | 0.0298               | 0.0076 |
| Complement factor B precursor - Homo sapiens                                 | P00751 CFAB_HUMAN  | 5                         | 13.09                     | 2                                | 0.6060               | 0.3560 |
| Alpha-1-antitrypsin precursor - Homo sapiens                                 | P01009 A1AT_HUMAN  | 5                         | 20.81                     | 4                                | 5.6504               | 0.6266 |
| Kininogen-1 precursor - Homo sapiens                                         | P01042 KNG1_HUMAN  | 9                         | 22.05                     | 6                                | 1.4499               | 0.1304 |
| Polymeric immunoglobulin receptor precursor - Homo sapiens                   | P01833 PIGR_HUMAN  | 6                         | 24.35                     | 10                               | 0.3459               | 0.2523 |
| Ig kappa chain C region - Homo sapiens                                       | P01834 KAC_HUMAN   | 15                        | 90.57                     | 27                               | 3.7174               | 0.6412 |
| Ig lambda chain C regions - Homo sapiens                                     | P01842 LAC_HUMAN   | 11                        | 78.10                     | 14                               | 20.6258              | 1.8803 |
| Ig gamma-1 chain C region - Homo sapiens                                     | P01857 IGHG1_HUMAN | 12                        | 60.91                     | 1                                | 2.4772               | 1.2099 |
| Ig gamma-2 chain C region - Homo sapiens                                     | P01859 IGHG2_HUMAN | 12                        | 55.83                     | 6                                | 7.3377               | 4.5765 |
| Ig gamma-3 chain C region - Homo sapiens                                     | P01860 IGHG3_HUMAN | 9                         | 37.93                     | 4                                | 1.3686               | 0.7541 |
| Ig alpha-2 chain C region - Homo sapiens                                     | P01877 IGHA2_HUMAN | 13                        | 57.65                     | 11                               | 12.5263              | 6.9478 |
| Collagen alpha-1(I) chain precursor - Homo sapiens                           | P02452 CO1A1_HUMAN | 49                        | 59.02                     | 27                               | 0.8837               | 1.1015 |
| Collagen alpha-1(III) chain precursor - Homo sapiens                         | P02461 CO3A1_HUMAN | 34                        | 58.12                     | 25                               | 0.0371               | 0.0157 |
| Fibrinogen alpha chain precursor [Contains: Fibrinopeptide A] - Homo sapiens | P02671 FIBA_HUMAN  | 5                         | 25.64                     | 4                                | 0.9579               | 0.1422 |
| Leucine-rich alpha-2-glycoprotein precursor - Homo sapiens                   | P02750 A2GL_HUMAN  | 3                         | 24.50                     | 5                                | 3.7244               | 1.0088 |
| Fibronectin precursor - Homo sapiens                                         | P02751 FINC_HUMAN  | 7                         | 23.26                     | 8                                | 0.9760               | 0.9429 |
| AMBIP protein precursor [Contains: Alpha-1-microglobulin - Homo sapiens      | P02760 AMBIP_HUMAN | 43                        | 72.44                     | 96                               | 0.5816               | 0.3791 |
| Alpha-1-acid glycoprotein 1 precursor - Homo sapiens                         | P02763 A1AG1_HUMAN | 47                        | 82.09                     | 32                               | 19.3411              | 8.4309 |
| Alpha-2-HS-glycoprotein precursor - Homo sapiens                             | P02765 FETUA_HUMAN | 10                        | 38.96                     | 17                               | 1.7218               | 1.2562 |
| Serum albumin precursor - Homo sapiens                                       | P02768 ALBU_HUMAN  | 134                       | 79.64                     | 312                              | 1.3228               | 0.4991 |
| Vitamin D-binding protein precursor - Homo                                   | P02774 VTDB_HUMAN  | 4                         | 14.77                     | 2                                | 1.7628               | 0.5314 |

Optimizing a proteomics platform for urine biomarker discovery

|                                                                          |                    |    |       |     |         |        |
|--------------------------------------------------------------------------|--------------------|----|-------|-----|---------|--------|
| sapiens                                                                  |                    |    |       |     |         |        |
| Serotransferrin precursor - Homo sapiens                                 | P02787 TRFE_HUMAN  | 54 | 58.88 | 106 | 33.7159 | 3.5212 |
| Hemopexin precursor - Homo sapiens                                       | P02790 HEMO_HUMAN  | 5  | 22.29 | 5   | 6.6714  | 1.9015 |
| Salivary acidic proline-rich phosphoprotein 1/2 precursor - Homo sapiens | P02810 PRPC_HUMAN  | 5  | 43.37 | 2   | 0.1352  | 0.1153 |
| Coagulation factor XI precursor - Homo sapiens                           | P03951 FA11_HUMAN  | 2  | 14.08 | 1   | 0.6370  | 0.4002 |
| Vitamin K-dependent protein C precursor - Homo sapiens                   | P04070 PROC_HUMAN  | 2  | 3.90  | 1   | 0.5068  | 0.5171 |
| N-myc proto-oncogene protein - Homo sapiens                              | P04198 MYCN_HUMAN  | 4  | 19.40 | 1   | 0.3500  | 0.1472 |
| Alpha-1B-glycoprotein precursor - Homo sapiens                           | P04217 A1BG_HUMAN  | 13 | 34.75 | 17  | 24.8434 | 4.8601 |
| Ig kappa chain V-III region VG precursor - Homo sapiens                  | P04433 KV309_HUMAN | 9  | 60.00 | 3   | 1.2962  | 0.2848 |
| Ig kappa chain V-III region VH precursor - Homo sapiens                  | P04434 KV310_HUMAN | 6  | 37.93 | 4   | 9.5368  | 1.5373 |
| Apolipoprotein D precursor - Homo sapiens                                | P05090 APOD_HUMAN  | 2  | 23.28 | 4   | 0.3252  | 0.0285 |
| Ig kappa chain V-II region GM607 precursor - Homo sapiens                | P06309 KV205_HUMAN | 4  | 59.83 | 3   | 3.3186  | 0.4472 |
| Trypsin-1 precursor - Homo sapiens                                       | P07477 TRY1_HUMAN  | 10 | 34.01 | 3   | 1.2902  | 0.8457 |
| Uromodulin precursor - Homo sapiens                                      | P07911 UROM_HUMAN  | 11 | 33.28 | 17  | 0.1283  | 0.0560 |
| Collagen alpha-2(I) chain precursor - Homo sapiens                       | P08123 CO1A2_HUMAN | 23 | 61.35 | 8   | 0.0862  | 0.0632 |
| Non-secretory ribonuclease precursor - Homo sapiens                      | P10153 RNAS2_HUMAN | 2  | 25.47 | 1   | 0.4251  | 0.2122 |
| Osteopontin precursor - Homo sapiens                                     | P10451 OSTP_HUMAN  | 7  | 26.43 | 7   | 0.2720  | 0.0386 |
| DNA topoisomerase 2-alpha - Homo sapiens                                 | P11388 TOP2A_HUMAN | 8  | 11.10 | 3   | 1.1864  | 0.2507 |
| CD59 glycoprotein precursor - Homo sapiens                               | P13987 CD59_HUMAN  | 12 | 44.53 | 23  | 2.1748  | 1.2303 |
| Ig kappa chain V-III region HAH precursor - Homo sapiens                 | P18135 KV312_HUMAN | 11 | 79.07 | 5   | 5.7479  | 2.1091 |
| Protein-glutamine gamma-glutamyltransferase 2 - Homo sapiens             | P21980 TGM2_HUMAN  | 2  | 13.68 | 2   | 0.4381  | 0.2034 |
| Tenascin-X precursor - Homo sapiens                                      | P22105 TENX_HUMAN  | 18 | 35.35 | 6   | 2.2428  | 0.5404 |
| Zinc-alpha-2-glycoprotein precursor - Homo sapiens                       | P25311 ZA2G_HUMAN  | 35 | 74.92 | 47  | 16.7464 | 7.1483 |
| CD27 antigen precursor - Homo sapiens                                    | P26842 CD27_HUMAN  | 4  | 28.08 | 7   | 0.9042  | 0.7367 |
| Prostaglandin-H2 D-isomerase precursor - Homo sapiens                    | P41222 PTGDS_HUMAN | 16 | 70.53 | 32  | 0.9096  | 0.8404 |
| Afamin precursor - Homo sapiens                                          | P43652 AFAM_HUMAN  | 7  | 12.35 | 4   | 2.9635  | 1.1067 |

Optimizing a proteomics platform for urine biomarker discovery

|                                                                                               |                     |    |       |    |        |        |
|-----------------------------------------------------------------------------------------------|---------------------|----|-------|----|--------|--------|
| Dipeptidyl-peptidase 1 precursor - Homo sapiens                                               | P53634 CATC_HUMAN   | 3  | 11.88 | 2  | 6.0960 | 2.3111 |
| Cadherin-13 precursor - Homo sapiens                                                          | P55290 CAD13_HUMAN  | 2  | 15.71 | 2  | 3.3274 | 1.9889 |
| Beta-defensin 1 precursor - Homo sapiens                                                      | P60022 BD01_HUMAN   | 2  | 14.71 | 5  | 0.0377 | 0.0357 |
| HERV-K_12q14.1 provirus ancestral Env polyprotein precursor - Homo sapiens                    | P61565 ENK1_HUMAN   | 6  | 17.34 | 3  | 2.3244 | 2.2684 |
| Beta-2-microglobulin precursor [Contains: Beta-2-microglobulin form pI 5.3] - Homo sapiens    | P61769 B2MG_HUMAN   | 3  | 30.25 | 7  | 9.2782 | 2.5082 |
| Basement membrane-specific heparan sulfate proteoglycan core protein precursor - Homo sapiens | P98160 PGBM_HUMAN   | 32 | 31.25 | 15 | 0.6262 | 0.4147 |
| RNA-binding protein 10 - Homo sapiens (Human)                                                 | P98175 IRBM10_HUMAN | 2  | 16.36 | 1  | 0.0435 | 0.0274 |
| WAP four-disulfide core domain protein 2 precursor - Homo sapiens                             | Q14508 WFDC2_HUMAN  | 3  | 25.81 | 3  | 1.4925 | 0.7349 |
| Inositol 1,4,5-trisphosphate receptor type 2 - Homo sapiens                                   | Q14571 ITPR2_HUMAN  | 9  | 11.77 | 4  | 6.4130 | 2.5001 |
| Inter-alpha-trypsin inhibitor heavy chain H4 precursor - Homo sapiens                         | Q14624 ITI4_HUMAN   | 4  | 23.76 | 6  | 1.0374 | 0.1572 |
| Condensin complex subunit 1 - Homo sapiens                                                    | Q15021 CND1_HUMAN   | 5  | 14.13 | 1  | 1.5830 | 1.1279 |
| Myosin light chain kinase, smooth muscle - Homo sapiens                                       | Q15746 MYLK_HUMAN   | 5  | 16.30 | 4  | 0.4742 | 0.1736 |
| Plasma membrane calcium-transporting ATPase 3 - Homo sapiens                                  | Q16720 AT2B3_HUMAN  | 3  | 9.75  | 1  | 1.4174 | 0.7671 |
| Solute carrier family 22 member 10 - Homo sapiens                                             | Q63ZE4 OAT5_HUMAN   | 5  | 7.16  | 3  | 2.3647 | 2.3097 |
| Leukocyte-associated immunoglobulin-like receptor 1 precursor - Homo sapiens                  | Q6GTX8 LAIR1_HUMAN  | 4  | 28.22 | 4  | 0.5755 | 0.2387 |
| Sodium/potassium/calcium exchanger 6 precursor - Homo sapiens                                 | Q6J4K2 NCKX6_HUMAN  | 7  | 24.49 | 1  | 0.3141 | 0.0907 |
| Prickle-like protein 2 - Homo sapiens                                                         | Q7Z3G6 PRIC2_HUMAN  | 2  | 11.97 | 1  | 0.1834 | 0.0295 |
| Mediator of RNA polymerase II transcription subunit 12-like protein - Homo sapiens            | Q86YW9 MD12L_HUMAN  | 9  | 10.91 | 2  | 4.5245 | 2.8282 |
| Extracellular sulfatase Sulf-2 precursor - Homo sapiens                                       | Q8IWU5 SULF2_HUMAN  | 3  | 15.86 | 4  | 0.1628 | 0.0814 |
| Integrator complex subunit 1 - Homo sapiens                                                   | Q8N201 INT1_HUMAN   | 8  | 11.00 | 1  | 0.9442 | 0.1932 |
| Sugar phosphate exchanger 3 - Homo sapiens                                                    | Q8NCC5 SPX3_HUMAN   | 5  | 12.96 | 2  | 0.6615 | 0.0625 |
| Mucin-16 - Homo sapiens                                                                       | Q8WXI7 MUC16_HUMAN  | 48 | 21.02 | 13 | 0.1481 | 0.0633 |
| Titin - Homo sapiens                                                                          | Q8WZ42 TITIN_HUMAN  | 75 | 21.27 | 30 | 1.1384 | 0.4790 |

## Optimizing a proteomics platform for urine biomarker discovery

|                                                                          |                    |    |       |    |         |        |
|--------------------------------------------------------------------------|--------------------|----|-------|----|---------|--------|
| GCN1-like protein 1 - Homo sapiens                                       | Q92616 GCN1L_HUMAN | 11 | 13.93 | 5  | 14.5761 | 2.1601 |
| Phosphoinositide-3-kinase-interacting protein 1 precursor - Homo sapiens | Q96FE7 P3IP1_HUMAN | 7  | 34.60 | 13 | 0.0433  | 0.0315 |
| Ciliary dynein heavy chain 8 - Homo sapiens                              | Q96JB1 DYH8_HUMAN  | 17 | 12.61 | 2  | 0.4912  | 0.0200 |
| Cytochrome P450 2S1 - Homo sapiens                                       | Q96SQ9 CP2S1_HUMAN | 8  | 22.62 | 4  | 0.0889  | 0.0494 |
| p53-regulated apoptosis-inducing protein 1 - Homo sapiens                | Q9HCN2 TPIP1_HUMAN | 2  | 8.06  | 1  | 0.4359  | 0.2866 |
| Kinesin-like protein KIF13B - Homo sapiens                               | Q9NQT8 KI13B_HUMAN | 7  | 13.86 | 2  | 0.5809  | 0.1942 |
| Sex comb on midleg-like protein 1 - Homo sapiens                         | Q9UN30 SCML1_HUMAN | 2  | 8.65  | 1  | 0.2268  | 0.1820 |
| Kallikrein-5 precursor - Homo sapiens                                    | Q9Y337 KLK5_HUMAN  | 9  | 37.88 | 3  | 0.1766  | 0.0900 |

**Supplementary Table 5. Supplemental documentation for peptide and protein identification in Figure 5.**

| Name                                                                                 | Accession          | # unique peptides/protein | Percent Sequence coverage | # peptides used for quantitation | Protein Quantitation |         |
|--------------------------------------------------------------------------------------|--------------------|---------------------------|---------------------------|----------------------------------|----------------------|---------|
|                                                                                      |                    |                           |                           |                                  | Mean                 | STDEV   |
| Periplakin - Homo sapiens                                                            | O60437 PEPL_HUMAN  | 7                         | 11.45                     | 2                                | 86.8228              | 34.6776 |
| Leukocyte immunoglobulin-like receptor subfamily B member 5 precursor - Homo sapiens | O75023 LIRB5_HUMAN | 6                         | 13.73                     | 2                                | 3.2148               | 3.1207  |
| Cytosolic phospholipase A2 beta - Homo sapiens                                       | O95712 PA24B_HUMAN | 5                         | 14.62                     | 2                                | 1.3503               | 2.2138  |
| Pepsin A precursor - Homo sapiens                                                    | P00790 PEPA_HUMAN  | 2                         | 23.20                     | 1                                | 1.2844               | 1.4822  |
| Alpha-1-antitrypsin precursor - Homo sapiens                                         | P01009 A1AT_HUMAN  | 10                        | 39.00                     | 7                                | 12.0501              | 12.2724 |
| Kininogen-1 precursor - Homo sapiens                                                 | P01042 KNG1_HUMAN  | 6                         | 16.30                     | 7                                | 0.8211               | 0.9146  |
| Polymeric immunoglobulin receptor precursor - Homo sapiens                           | P01833 PIGR_HUMAN  | 4                         | 24.74                     | 2                                | 6.4528               | 9.6254  |
| Ig kappa chain C region - Homo sapiens                                               | P01834 KAC_HUMAN   | 9                         | 81.13                     | 6                                | 0.5080               | 0.5310  |
| Ig lambda chain C regions - Homo sapiens                                             | P01842 LAC_HUMAN   | 3                         | 32.38                     | 6                                | 0.5198               | 0.5003  |
| Ig gamma-2 chain C region - Homo sapiens                                             | P01859 IGHG2_HUMAN | 9                         | 42.02                     | 13                               | 0.3956               | 0.4206  |
| Ig alpha-2 chain C region - Homo sapiens                                             | P01877 IGHA2_HUMAN | 10                        | 39.12                     | 9                                | 0.3869               | 0.3515  |
| Collagen alpha-1(I) chain precursor - Homo sapiens                                   | P02452 CO1A1_HUMAN | 33                        | 58.54                     | 29                               | 12.9255              | 19.5509 |
| Collagen alpha-1(III) chain precursor - Homo sapiens                                 | P02461 CO3A1_HUMAN | 35                        | 58.59                     | 25                               | 7.9553               | 11.9289 |
| AMBP protein precursor [Contains: Alpha-1-microglobulin - Homo sapiens               | P02760 AMBP_HUMAN  | 44                        | 61.08                     | 97                               | 10.5987              | 14.3539 |
| Alpha-1-acid glycoprotein 1 precursor - Homo sapiens                                 | P02763 A1AG1_HUMAN | 14                        | 52.24                     | 20                               | 14.7228              | 12.7889 |
| Serum albumin precursor - Homo sapiens                                               | P02768 ALBU_HUMAN  | 167                       | 74.88                     | 348                              | 1.5929               | 0.5309  |
| Serotransferrin precursor - Homo sapiens                                             | P02787 TRFE_HUMAN  | 19                        | 33.95                     | 16                               | 3.5542               | 4.3218  |
| Alpha-1B-glycoprotein precursor - Homo sapiens                                       | P04217 A1BG_HUMAN  | 5                         | 14.34                     | 1                                | 1.2083               | 0.6600  |
| Trypsin-2 precursor - Homo sapiens                                                   | P07478 TRY2_HUMAN  | 10                        | 30.77                     | 6                                | 0.4148               | 0.2716  |
| Uromodulin precursor - Homo sapiens                                                  | P07911 UROM_HUMAN  | 40                        | 56.41                     | 78                               | 10.8459              | 14.7705 |
| Ribonuclease pancreatic precursor - Homo sapiens                                     | P07998 RNAS1_HUMAN | 3                         | 13.46                     | 3                                | 1.5012               | 1.7055  |
| Osteopontin precursor - Homo sapiens                                                 | P10451 OSTP_HUMAN  | 6                         | 18.79                     | 7                                | 10.6280              | 17.4396 |
| CD59 glycoprotein precursor - Homo sapiens                                           | P13987 CD59_HUMAN  | 12                        | 49.22                     | 13                               | 6.6601               | 9.0215  |
| CD44 antigen precursor - Homo sapiens                                                | P16070 CD44_HUMAN  | 2                         | 15.90                     | 1                                | 2.4190               | 2.9846  |

Optimizing a proteomics platform for urine biomarker discovery

|                                                                                               |                    |    |       |    |         |         |
|-----------------------------------------------------------------------------------------------|--------------------|----|-------|----|---------|---------|
| Cyclic AMP-dependent transcription factor ATF-7 - Homo sapiens                                | P17544 ATF7_HUMAN  | 3  | 22.06 | 1  | 3.9611  | 3.9630  |
| Ig kappa chain V-III region HIC precursor - Homo sapiens                                      | P18136 KV313_HUMAN | 4  | 34.88 | 4  | 0.5434  | 0.4036  |
| Zinc-alpha-2-glycoprotein precursor - Homo sapiens                                            | P25311 ZA2G_HUMAN  | 12 | 26.10 | 12 | 0.8381  | 0.4798  |
| Trypsin-3 precursor - Homo sapiens                                                            | P35030 TRY3_HUMAN  | 8  | 29.93 | 3  | 1.0476  | 0.6972  |
| Chloride channel protein ClC-Ka - Homo sapiens                                                | P51800 CLCKA_HUMAN | 7  | 24.60 | 2  | 0.5475  | 0.4503  |
| HERV-K_12q14.1 provirus ancestral Env polyprotein precursor - Homo sapiens                    | P61565 ENK1_HUMAN  | 4  | 16.91 | 4  | 9.8924  | 8.2519  |
| Ubiquitin - Homo sapiens                                                                      | P62988 UBIQ_HUMAN  | 6  | 61.84 | 1  | 0.8265  | 0.7830  |
| Basement membrane-specific heparan sulfate proteoglycan core protein precursor - Homo sapiens | P98160 PGBM_HUMAN  | 17 | 20.43 | 7  | 2.7837  | 2.9790  |
| Plasma membrane calcium-transporting ATPase 2 - Homo sapiens                                  | Q01814 AT2B2_HUMAN | 5  | 15.45 | 1  | 86.8228 | 34.6776 |
| Centromeric protein E - Homo sapiens                                                          | Q02224 CENPE_HUMAN | 7  | 16.44 | 1  | 86.8228 | 34.6776 |
| Zinc finger protein HRX - Homo sapiens                                                        | Q03164 HRX_HUMAN   | 17 | 17.99 | 3  | 2.8829  | 1.8107  |
| Calcium-activated potassium channel subunit alpha-1 - Homo sapiens                            | Q12791 KCMA1_HUMAN | 4  | 15.94 | 2  | 12.0951 | 10.3213 |
| Myosin-VIIa - Homo sapiens                                                                    | Q13402 MYO7A_HUMAN | 9  | 11.42 | 2  | 1.4939  | 1.9977  |
| Inositol 1,4,5-trisphosphate receptor type 2 - Homo sapiens                                   | Q14571 ITPR2_HUMAN | 13 | 13.96 | 1  | 2.3613  | 1.6512  |
| Plectin-1 - Homo sapiens                                                                      | Q15149 PLEC1_HUMAN | 17 | 14.73 | 3  | 0.6693  | 0.6211  |
| Serum paraoxonase/lactonase 3 - Homo sapiens                                                  | Q15166 PON3_HUMAN  | 2  | 16.67 | 1  | 5.7091  | 4.1673  |
| Nuclear receptor coactivator 1 - Homo sapiens                                                 | Q15788 NCOA1_HUMAN | 3  | 19.36 | 1  | 86.8228 | 34.6776 |
| Centrosomal protein of 170 kDa - Homo sapiens                                                 | Q5SW79 CE170_HUMAN | 3  | 7.95  | 1  | 1.6517  | 0.6070  |
| Integral membrane protein GPR155 - Homo sapiens                                               | Q7Z3F1 GP155_HUMAN | 8  | 11.38 | 3  | 1.3507  | 0.7207  |
| Ankyrin and armadillo repeat-containing protein - Homo sapiens                                | Q7Z5J8 ANKAR_HUMAN | 6  | 9.07  | 4  | 16.3545 | 10.4926 |
| Extracellular sulfatase Sulf-2 precursor - Homo sapiens                                       | Q8IWU5 SULF2_HUMAN | 3  | 12.18 | 3  | 2.0958  | 3.1668  |
| SET and MYND domain-containing protein 4 - Homo sapiens                                       | Q8IYR2 SMYD4_HUMAN | 10 | 15.05 | 4  | 3.1443  | 1.5726  |
| Titin - Homo sapiens                                                                          | Q8WZ42 TITIN_HUMAN | 75 | 20.15 | 23 | 86.8228 | 34.6776 |
| Protein tyrosine phosphatase type IVA protein 1 -                                             | Q93096 TP4A1_HUMAN | 2  | 16.18 | 3  | 16.0692 | 8.0794  |

Optimizing a proteomics platform for urine biomarker discovery

|                                                                          |                    |    |       |   |         |         |
|--------------------------------------------------------------------------|--------------------|----|-------|---|---------|---------|
| Homo sapiens                                                             |                    |    |       |   |         |         |
| Phosphoinositide-3-kinase-interacting protein 1 precursor - Homo sapiens | Q96FE7 P3IP1_HUMAN | 4  | 27.38 | 6 | 4.7593  | 6.2508  |
| CDK5 regulatory subunit-associated protein 1 - Homo sapiens              | Q96SZ6 CK5P1_HUMAN | 4  | 10.15 | 1 | 86.8228 | 34.6776 |
| Vacuolar protein sorting-associated protein 16 homolog - Homo sapiens    | Q9H269 VPS16_HUMAN | 4  | 14.42 | 1 | 1.7289  | 0.4555  |
| Homeodomain-interacting protein kinase 2 - Homo sapiens                  | Q9H2X6 HIPK2_HUMAN | 5  | 14.02 | 1 | 86.8228 | 34.6776 |
| Ciliary dynein heavy chain 9 - Homo sapiens                              | Q9NYC9 DYH9_HUMAN  | 17 | 15.43 | 1 | 1.6619  | 1.1042  |
| Collagen alpha-1(XX) chain precursor - Homo sapiens                      | Q9P218 COKA1_HUMAN | 6  | 12.57 | 1 | 0.5783  | 0.2039  |



**Supplementary Table 6. Supplemental documentation for peptide and protein identification in supplementary Figure 4.**

| Name                                                                                        | Accession           | # unique peptides/protein | Percent Sequence coverage | # peptides used for quantitation | Protein Quantitation |        |
|---------------------------------------------------------------------------------------------|---------------------|---------------------------|---------------------------|----------------------------------|----------------------|--------|
|                                                                                             |                     |                           |                           |                                  | Mean                 | STDEV  |
| Mannan-binding lectin serine protease 2 precursor - Homo sapiens (Human)                    | O00187 MASP2_HUMAN  | 8                         | 24.78                     | 11                               | 1.0000               | 0.2788 |
| Signal regulatory protein beta-1 precursor - Homo sapiens (Human)                           | O00241 SIRB1_HUMAN  | 4                         | 16.83                     | 1                                | 0.9222               | 0.3400 |
| Neuropilin-2 precursor - Homo sapiens (Human)                                               | O60462 NRP2_HUMAN   | 3                         | 9.24                      | 3                                | 0.9855               | 0.3458 |
| Cubilin precursor - Homo sapiens (Human)                                                    | O60494 CUBN_HUMAN   | 11                        | 22.03                     | 6                                | 1.1443               | 0.4918 |
| Low affinity immunoglobulin gamma Fc region receptor III-B precursor - Homo sapiens (Human) | O75015 IFCG3B_HUMAN | 4                         | 21.03                     | 6                                | 1.0316               | 0.3141 |
| Peptidoglycan recognition protein precursor - Homo sapiens (Human)                          | O75594 PGRP_HUMAN   | 2                         | 8.16                      | 2                                | 1.1561               | 0.3029 |
| Cytosolic phospholipase A2 beta - Homo sapiens (Human)                                      | O95712 IPA24B_HUMAN | 4                         | 7.71                      | 4                                | 0.8172               | 0.2352 |
| Ceruloplasmin precursor - Homo sapiens (Human)                                              | P00450 CERU_HUMAN   | 3                         | 9.30                      | 1                                | 0.9188               | 0.1533 |
| Prothrombin precursor - Homo sapiens (Human)                                                | P00734 THRB_HUMAN   | 4                         | 19.45                     | 2                                | 1.1455               | 0.4075 |
| Plasminogen precursor - Homo sapiens (Human)                                                | P00747 PLMN_HUMAN   | 4                         | 16.79                     | 3                                | 0.9350               | 0.3503 |
| Pepsin A precursor - Homo sapiens (Human)                                                   | P00790 PEPA_HUMAN   | 13                        | 21.39                     | 17                               | 1.0059               | 0.2910 |
| Alpha-1-antitrypsin precursor - Homo sapiens (Human)                                        | P01009 A1AT_HUMAN   | 4                         | 28.47                     | 2                                | 1.1792               | 0.5575 |
| Alpha-1-antichymotrypsin precursor - Homo sapiens (Human)                                   | P01011 AACT_HUMAN   | 3                         | 17.97                     | 1                                | 0.8568               | 0.3538 |
| Kininogen-1 precursor - Homo sapiens (Human)                                                | P01042 KNG1_HUMAN   | 14                        | 40.22                     | 20                               | 1.1748               | 0.5450 |
| Pro-epidermal growth factor precursor - Homo sapiens (Human)                                | P01133 EGF_HUMAN    | 13                        | 25.27                     | 8                                | 0.9550               | 0.1945 |
| Ig kappa chain V-I region AU - Homo sapiens (Human)                                         | P01594 KV102_HUMAN  | 2                         | 47.22                     | 1                                | 0.9279               | 0.0929 |
| Ig heavy chain V-III region KOL - Homo sapiens (Human)                                      | P01772 HV311_HUMAN  | 2                         | 23.02                     | 1                                | 0.9259               | 0.0704 |
| Polymeric immunoglobulin receptor precursor - Homo sapiens (Human)                          | P01833 PIGR_HUMAN   | 10                        | 35.73                     | 4                                | 1.0861               | 0.3824 |
| Ig kappa chain C region - Homo sapiens (Human)                                              | P01834 KAC_HUMAN    | 18                        | 89.62                     | 30                               | 1.6600               | 0.9942 |

Optimizing a proteomics platform for urine biomarker discovery

|                                                                                      |                    |    |       |     |        |        |
|--------------------------------------------------------------------------------------|--------------------|----|-------|-----|--------|--------|
| Ig mu chain C region - Homo sapiens (Human)                                          | P01871 MUC_HUMAN   | 3  | 27.31 | 3   | 1.0353 | 0.3120 |
| Ig alpha-1 chain C region - Homo sapiens (Human)                                     | P01876 IGHA1_HUMAN | 6  | 45.89 | 6   | 1.0520 | 0.4383 |
| Collagen alpha-1(I) chain precursor - Homo sapiens (Human)                           | P02452 CO1A1_HUMAN | 92 | 80.74 | 66  | 1.1523 | 0.5331 |
| Collagen alpha-1(II) chain precursor - Homo sapiens (Human)                          | P02458 CO2A1_HUMAN | 39 | 70.81 | 3   | 0.8037 | 0.2181 |
| Collagen alpha-1(III) chain precursor - Homo sapiens (Human)                         | P02461 CO3A1_HUMAN | 58 | 75.03 | 31  | 1.1165 | 0.4451 |
| Fibrinogen alpha chain precursor [Contains: Fibrinopeptide A] - Homo sapiens (Human) | P02671 FIBA_HUMAN  | 10 | 29.10 | 8   | 1.2313 | 0.4728 |
| Leucine-rich alpha-2-glycoprotein precursor - Homo sapiens (Human)                   | P02750 A2GL_HUMAN  | 11 | 53.60 | 15  | 1.0948 | 0.4443 |
| AMBIP protein precursor [Contains: Alpha-1-microglobulin - Homo sapiens (Human)]     | P02760 AMBIP_HUMAN | 60 | 73.58 | 106 | 1.1449 | 0.4812 |
| Alpha-1-acid glycoprotein 1 precursor - Homo sapiens (Human)                         | P02763 A1AG1_HUMAN | 24 | 69.65 | 41  | 1.5465 | 0.8201 |
| Alpha-2-HS-glycoprotein precursor - Homo sapiens (Human)                             | P02765 FETUA_HUMAN | 4  | 10.63 | 5   | 0.9692 | 0.3651 |
| Serum albumin precursor - Homo sapiens (Human)                                       | P02768 ALBU_HUMAN  | 81 | 66.83 | 150 | 1.1752 | 0.5408 |
| Serotransferrin precursor - Homo sapiens (Human)                                     | P02787 TRFE_HUMAN  | 12 | 26.36 | 14  | 0.9353 | 0.2742 |
| Vitamin K-dependent protein C precursor - Homo sapiens (Human)                       | P04070 PROC_HUMAN  | 3  | 11.06 | 1   | 0.9138 | 0.2769 |
| Major prion protein precursor - Homo sapiens (Human)                                 | P04156 PRIO_HUMAN  | 3  | 31.23 | 2   | 1.0632 | 0.3486 |
| Alpha-1B-glycoprotein precursor - Homo sapiens (Human)                               | P04217 A1BG_HUMAN  | 11 | 41.62 | 11  | 0.9006 | 0.2754 |
| Pancreatic alpha-amylase precursor - Homo sapiens (Human)                            | P04746 AMYP_HUMAN  | 4  | 30.53 | 8   | 0.9328 | 0.3472 |
| Apolipoprotein D precursor - Homo sapiens (Human)                                    | P05090 APOD_HUMAN  | 16 | 53.44 | 24  | 0.9343 | 0.2800 |
| Plasma serine protease inhibitor precursor - Homo sapiens (Human)                    | P05154 PSP_HUMAN   | 7  | 29.31 | 7   | 0.9840 | 0.2764 |
| Gelsolin precursor - Homo sapiens (Human)                                            | P06396 GELS_HUMAN  | 8  | 39.77 | 7   | 0.9442 | 0.2855 |
| Trypsin-2 precursor - Homo sapiens (Human)                                           | P07478 TRY2_HUMAN  | 5  | 30.36 | 2   | 1.1863 | 0.1674 |
| Uromodulin precursor - Homo sapiens (Human)                                          | P07911 UROM_HUMAN  | 21 | 45.78 | 16  | 1.0380 | 0.2785 |

Optimizing a proteomics platform for urine biomarker discovery

|                                                                                   |                     |    |       |    |        |        |
|-----------------------------------------------------------------------------------|---------------------|----|-------|----|--------|--------|
| Ribonuclease pancreatic precursor - Homo sapiens (Human)                          | P07998 IRNAS1_HUMAN | 5  | 32.69 | 1  | 1.8445 | 1.4239 |
| Collagen alpha-2(I) chain precursor - Homo sapiens (Human)                        | P08123 CO1A2_HUMAN  | 38 | 72.99 | 10 | 1.1759 | 0.5438 |
| Corticosteroid-binding globulin precursor - Homo sapiens (Human)                  | P08185 CBG_HUMAN    | 4  | 22.96 | 1  | 0.8280 | 0.2776 |
| Monocyte differentiation antigen CD14 precursor - Homo sapiens (Human)            | P08571 CD14_HUMAN   | 13 | 65.07 | 14 | 0.9542 | 0.2976 |
| Collagen alpha-2(IV) chain precursor [Contains: Canstatin] - Homo sapiens (Human) | P08572 CO4A2_HUMAN  | 11 | 24.18 | 1  | 0.9110 | 0.1578 |
| Non-secretory ribonuclease precursor - Homo sapiens (Human)                       | P10153 IRNAS2_HUMAN | 3  | 36.02 | 1  | 1.1144 | 0.6225 |
| Lysosomal alpha-glucosidase precursor - Homo sapiens (Human)                      | P10253 LYAG_HUMAN   | 4  | 21.85 | 3  | 1.0564 | 0.4777 |
| Osteopontin precursor - Homo sapiens (Human)                                      | P10451 OSTP_HUMAN   | 7  | 34.71 | 28 | 1.0338 | 0.3947 |
| Clusterin precursor - Homo sapiens (Human)                                        | P10909 CLUS_HUMAN   | 4  | 18.49 | 2  | 0.8311 | 0.2299 |
| Uteroglobin precursor - Homo sapiens (Human)                                      | P11684 UTER_HUMAN   | 2  | 37.36 | 2  | 1.4662 | 0.9123 |
| Collagen alpha-1(XI) chain precursor - Homo sapiens (Human)                       | P12107 COBA1_HUMAN  | 15 | 42.64 | 1  | 1.0427 | 0.4947 |
| Collagen alpha-1(VI) chain precursor - Homo sapiens (Human)                       | P12109 CO6A1_HUMAN  | 7  | 31.61 | 3  | 1.0277 | 0.2772 |
| Epithelial cadherin precursor - Homo sapiens (Human)                              | P12830 CADH1_HUMAN  | 7  | 17.91 | 3  | 1.3994 | 0.8596 |
| CD59 glycoprotein precursor - Homo sapiens (Human)                                | P13987 CD59_HUMAN   | 21 | 49.22 | 34 | 0.9039 | 0.2685 |
| Nidogen-1 precursor - Homo sapiens (Human)                                        | P14543 NID1_HUMAN   | 3  | 20.29 | 2  | 0.9125 | 0.2916 |
| Prostatic acid phosphatase precursor - Homo sapiens (Human)                       | P15309 PPAP_HUMAN   | 2  | 18.91 | 1  | 0.8678 | 0.1302 |
| CD44 antigen precursor - Homo sapiens (Human)                                     | P16070 CD44_HUMAN   | 5  | 26.15 | 11 | 1.4172 | 0.6369 |
| Ig kappa chain V-III region HIC precursor - Homo sapiens (Human)                  | P18136 KV313_HUMAN  | 13 | 55.81 | 16 | 0.9639 | 0.2878 |
| Zinc-alpha-2-glycoprotein precursor - Homo sapiens (Human)                        | P25311 ZA2G_HUMAN   | 37 | 77.63 | 57 | 1.1064 | 0.4188 |
| CD27 antigen precursor - Homo sapiens (Human)                                     | P26842 CD27_HUMAN   | 2  | 26.92 | 2  | 1.3240 | 0.6695 |
| Tyrosine-protein kinase receptor UFO precursor - Homo sapiens (Human)             | P30530 UFO_HUMAN    | 6  | 27.96 | 7  | 0.9649 | 0.2885 |

Optimizing a proteomics platform for urine biomarker discovery

|                                                                                                       |                    |    |       |    |        |        |
|-------------------------------------------------------------------------------------------------------|--------------------|----|-------|----|--------|--------|
| Trypsin-3 precursor - Homo sapiens (Human)                                                            | P35030 TRY3_HUMAN  | 5  | 21.71 | 2  | 1.1296 | 0.4688 |
| Glycogen debranching enzyme - Homo sapiens (Human)                                                    | P35573 GDE_HUMAN   | 2  | 8.94  | 1  | 2.3424 | 2.5085 |
| Prostaglandin-H2 D-isomerase precursor - Homo sapiens (Human)                                         | P41222 PTGDS_HUMAN | 27 | 74.21 | 49 | 1.1553 | 0.5284 |
| Alpha-N-acetylglucosaminidase precursor - Homo sapiens (Human)                                        | P54802 ANAG_HUMAN  | 5  | 31.22 | 6  | 0.9732 | 0.3231 |
| Cadherin-13 precursor - Homo sapiens (Human)                                                          | P55290 CAD13_HUMAN | 8  | 28.05 | 6  | 0.8379 | 0.1660 |
| Beta-defensin 1 precursor - Homo sapiens (Human)                                                      | P60022 BD01_HUMAN  | 3  | 47.06 | 5  | 1.2034 | 0.5801 |
| Ubiquitin - Homo sapiens (Human)                                                                      | P62988 UBIQ_HUMAN  | 5  | 72.37 | 5  | 1.0741 | 0.3597 |
| Retinal-specific ATP-binding cassette transporter - Homo sapiens (Human)                              | P78363 ABCA4_HUMAN | 2  | 10.78 | 1  | 1.3595 | 0.6839 |
| Basement membrane-specific heparan sulfate proteoglycan core protein precursor - Homo sapiens (Human) | P98160 PGBM_HUMAN  | 38 | 48.99 | 25 | 0.8993 | 0.2261 |
| Low-density lipoprotein receptor-related protein 2 precursor - Homo sapiens (Human)                   | P98164 LRP2_HUMAN  | 11 | 14.56 | 4  | 1.0431 | 0.2893 |
| Collagen alpha-1(XIV) chain precursor - Homo sapiens (Human)                                          | Q05707 COEA1_HUMAN | 6  | 15.42 | 1  | 1.5395 | 1.1800 |
| Galectin-3-binding protein precursor - Homo sapiens (Human)                                           | Q08380 LG3BP_HUMAN | 3  | 19.66 | 5  | 0.9164 | 0.3286 |
| Vesicular integral-membrane protein VIP36 precursor - Homo sapiens (Human)                            | Q12907 LMAN2_HUMAN | 11 | 33.15 | 8  | 0.9020 | 0.2862 |
| Protein tyrosine phosphatase type IVA protein 2 - Homo sapiens (Human)                                | Q12974 TP4A2_HUMAN | 3  | 10.78 | 1  | 0.9071 | 0.1384 |
| Inter-alpha-trypsin inhibitor heavy chain H4 precursor - Homo sapiens (Human)                         | Q14624 ITIH4_HUMAN | 16 | 36.67 | 13 | 1.0466 | 0.3218 |
| Vasorin precursor - Homo sapiens (Human)                                                              | Q6EMK4 VASN_HUMAN  | 18 | 59.29 | 11 | 1.0260 | 0.3165 |
| Leukocyte-associated immunoglobulin-like receptor 1 precursor - Homo sapiens (Human)                  | Q6GTX8 LAIR1_HUMAN | 4  | 35.19 | 2  | 1.0379 | 0.3372 |
| C-type lectin domain family 4 member G - Homo sapiens (Human)                                         | Q6UXB4 CLC4G_HUMAN | 3  | 14.68 | 2  | 0.9009 | 0.2528 |
| Activating transcription factor 7-interacting protein 1 - Homo sapiens (Human)                        | Q6VMQ6 MCAF1_HUMAN | 4  | 12.52 | 1  | 0.7894 | 0.2709 |
| Zinc finger protein 517 - Homo sapiens (Human)                                                        | Q6ZMY9 ZN517_HUMAN | 3  | 22.36 | 1  | 0.9249 | 0.1378 |
| Uncharacterized protein C11orf81 - Homo sapiens (Human)                                               | Q6ZV59 CK081_HUMAN | 2  | 8.07  | 1  | 2.0427 | 1.4438 |

Optimizing a proteomics platform for urine biomarker discovery

|                                                                                            |                    |    |       |    |        |        |
|--------------------------------------------------------------------------------------------|--------------------|----|-------|----|--------|--------|
| Voltage-dependent calcium channel subunit alpha-2/delta-4 precursor - Homo sapiens (Human) | Q7Z3S7ICA2D4_HUMAN | 2  | 10.38 | 1  | 1.2211 | 0.6579 |
| Vitelline membrane outer layer protein 1 homolog precursor - Homo sapiens (Human)          | Q7Z5L0IVMO1_HUMAN  | 4  | 37.13 | 2  | 0.9395 | 0.2040 |
| FYVE, RhoGEF and PH domain-containing protein 2 - Homo sapiens (Human)                     | Q7Z6J4IFGD2_HUMAN  | 3  | 15.42 | 1  | 0.8340 | 0.3265 |
| Extracellular sulfatase Sulf-2 precursor - Homo sapiens (Human)                            | Q81WU5ISULF2_HUMAN | 7  | 18.62 | 6  | 0.9266 | 0.2990 |
| Scotin precursor - Homo sapiens (Human)                                                    | Q8N114ISCTIN_HUMAN | 2  | 30.42 | 1  | 1.1090 | 0.4063 |
| RAS guanyl-releasing protein 4 - Homo sapiens                                              | Q8TDF6IGRP4_HUMAN  | 5  | 18.42 | 1  | 0.7315 | 0.3680 |
| SH3 multiple domains protein 4 precursor - Homo sapiens (Human)                            | Q8TEJ3ISH3D4_HUMAN | 6  | 25.74 | 2  | 0.8031 | 0.3666 |
| Titin - Homo sapiens (Human)                                                               | Q8WZ42ITITIN_HUMAN | 60 | 24.15 | 13 | 0.8526 | 0.2321 |
| Roundabout homolog 4 precursor - Homo sapiens (Human)                                      | Q8WZ75IROBO4_HUMAN | 7  | 15.19 | 3  | 1.3001 | 0.2600 |
| Poliovirus receptor-related protein 2 precursor - Homo sapiens (Human)                     | Q92692IPVRL2_HUMAN | 4  | 18.22 | 2  | 0.8892 | 0.3073 |
| Phosphoinositide-3-kinase-interacting protein 1 precursor - Homo sapiens (Human)           | Q96FE7IP3IP1_HUMAN | 15 | 45.63 | 16 | 1.0535 | 0.3825 |
| Deubiquitinating protein VCIP135 - Homo sapiens (Human)                                    | Q96JH7IVCIP1_HUMAN | 8  | 19.97 | 4  | 0.8038 | 0.1739 |
| Fc receptor-like protein 5 precursor - Homo sapiens (Human)                                | Q96RD9IFCRL5_HUMAN | 4  | 18.94 | 1  | 0.7966 | 0.1789 |
| ADP/ATP translocase 4 - Homo sapiens (Human)                                               | Q9H0C2IADT4_HUMAN  | 2  | 12.06 | 1  | 1.2172 | 0.7596 |
| SH3 domain-binding glutamic acid-rich-like protein 3 - Homo sapiens (Human)                | Q9H299ISH3L3_HUMAN | 2  | 38.71 | 3  | 0.9849 | 0.2862 |
| Pleckstrin homology domain-containing family G member 2 - Homo sapiens (Human)             | Q9H7P9IPKHG2_HUMAN | 3  | 11.83 | 1  | 1.8443 | 1.0931 |
| Multimerin-2 precursor - Homo sapiens (Human)                                              | Q9H8L6IMMRN2_HUMAN | 3  | 18.97 | 5  | 0.8075 | 0.2876 |
| Ubiquitin - Homo sapiens (Human)                                                           | Q9NPG3IUBN1_HUMAN  | 2  | 17.46 | 1  | 1.0838 | 0.5821 |
| F-box only protein 10 - Homo sapiens (Human)                                               | Q9UK96IFBX10_HUMAN | 4  | 17.09 | 2  | 1.3913 | 0.6700 |
| Endothelial protein C receptor precursor - Homo sapiens (Human)                            | Q9UNN8IEPCR_HUMAN  | 7  | 38.66 | 3  | 0.8234 | 0.2231 |

**Supplementary Table7. Supplemental documentation for peptide and protein identification in supplementary Figure 5.**

| Name                                                                                 | Accession          | # unique peptides/protein | Percent Sequence coverage | # peptides used for quantitation | Protein Quantitation |        |
|--------------------------------------------------------------------------------------|--------------------|---------------------------|---------------------------|----------------------------------|----------------------|--------|
|                                                                                      |                    |                           |                           |                                  | Mean                 | STDEV  |
| Mannan-binding lectin serine protease 2 precursor - Homo sapiens (Human)             | O00187 MASP2_HUMAN | 7                         | 28.72                     | 6                                | 0.7411               | 0.2700 |
| Neurosecretory protein VGF precursor - Homo sapiens (Human)                          | O15240 VGF_HUMAN   | 4                         | 21.59                     | 3                                | 1.3644               | 0.5217 |
| Pepsin A precursor - Homo sapiens (Human)                                            | P00790 PEPA_HUMAN  | 5                         | 17.53                     | 9                                | 0.7511               | 0.3338 |
| Kininogen-1 precursor - Homo sapiens (Human)                                         | P01042 KNG1_HUMAN  | 8                         | 23.60                     | 10                               | 1.5799               | 0.7498 |
| Pro-epidermal growth factor precursor - Homo sapiens (Human)                         | P01133 EGF_HUMAN   | 8                         | 12.92                     | 1                                | 0.8099               | 0.3671 |
| Ig mu chain C region - Homo sapiens (Human)                                          | P01871 MUC_HUMAN   | 6                         | 14.98                     | 1                                | 0.7239               | 0.2388 |
| Ig alpha-1 chain C region - Homo sapiens (Human)                                     | P01876 IGHA1_HUMAN | 6                         | 22.66                     | 4                                | 0.8463               | 0.3081 |
| Collagen alpha-1(I) chain precursor - Homo sapiens (Human)                           | P02452 CO1A1_HUMAN | 45                        | 53.55                     | 31                               | 1.3889               | 0.1893 |
| Collagen alpha-1(III) chain precursor - Homo sapiens (Human)                         | P02461 CO3A1_HUMAN | 27                        | 46.73                     | 9                                | 1.9531               | 0.9211 |
| Fibrinogen alpha chain precursor [Contains: Fibrinopeptide A] - Homo sapiens (Human) | P02671 FIBA_HUMAN  | 5                         | 17.32                     | 4                                | 2.8507               | 1.7786 |
| AMBP protein precursor [Contains: Alpha-1-microglobulin - Homo sapiens (Human)]      | P02760 AMBP_HUMAN  | 38                        | 58.52                     | 64                               | 0.8476               | 0.1383 |
| Alpha-1-acid glycoprotein 1 precursor - Homo sapiens (Human)                         | P02763 A1AG1_HUMAN | 5                         | 23.88                     | 1                                | 0.7995               | 0.7080 |
| Alpha-2-HS-glycoprotein precursor - Homo sapiens (Human)                             | P02765 FETUA_HUMAN | 8                         | 27.25                     | 4                                | 2.1143               | 1.4642 |
| Serum albumin precursor - Homo sapiens (Human)                                       | P02768 ALBU_HUMAN  | 92                        | 59.93                     | 135                              | 2.3270               | 1.7653 |
| Alpha-1B-glycoprotein precursor - Homo sapiens (Human)                               | P04217 A1BG_HUMAN  | 4                         | 11.92                     | 1                                | 0.7634               | 0.2887 |
| Pancreatic alpha-amylase precursor - Homo sapiens (Human)                            | P04746 AMYP_HUMAN  | 4                         | 10.37                     | 4                                | 1.3407               | 0.4374 |
| Apolipoprotein D precursor - Homo sapiens (Human)                                    | P05090 APOD_HUMAN  | 7                         | 39.68                     | 6                                | 0.6614               | 0.4902 |
| Plasma protease C1 inhibitor precursor - Homo sapiens (Human)                        | P05155 IC1_HUMAN   | 2                         | 7.20                      | 2                                | 1.2011               | 0.4798 |

Optimizing a proteomics platform for urine biomarker discovery

|                                                                                                       |                    |    |       |    |        |        |
|-------------------------------------------------------------------------------------------------------|--------------------|----|-------|----|--------|--------|
| Gelsolin precursor - Homo sapiens (Human)                                                             | P06396 GELS_HUMAN  | 2  | 11.89 | 1  | 0.4642 | 0.2511 |
| Uromodulin precursor - Homo sapiens (Human)                                                           | P07911 UROM_HUMAN  | 18 | 36.88 | 21 | 0.7664 | 0.1161 |
| Ribonuclease pancreatic precursor - Homo sapiens (Human)                                              | P07998 RNAS1_HUMAN | 3  | 14.74 | 2  | 1.3650 | 0.4086 |
| Collagen alpha-2(I) chain precursor - Homo sapiens (Human)                                            | P08123 CO1A2_HUMAN | 17 | 38.65 | 2  | 1.3987 | 0.3923 |
| Osteopontin precursor - Homo sapiens (Human)                                                          | P10451 OSTP_HUMAN  | 3  | 16.56 | 2  | 5.2342 | 3.7776 |
| Uteroglobin precursor - Homo sapiens (Human)                                                          | P11684 UTER_HUMAN  | 3  | 24.18 | 3  | 0.9616 | 0.2747 |
| CD59 glycoprotein precursor - Homo sapiens (Human)                                                    | P13987 CD59_HUMAN  | 14 | 41.41 | 20 | 1.2117 | 0.2839 |
| Prostatic acid phosphatase precursor - Homo sapiens (Human)                                           | P15309 PPAP_HUMAN  | 3  | 12.69 | 3  | 0.6439 | 0.2826 |
| CD44 antigen precursor - Homo sapiens (Human)                                                         | P16070 CD44_HUMAN  | 8  | 25.20 | 3  | 1.2246 | 0.2277 |
| Ig kappa chain V-III region HIC precursor - Homo sapiens (Human)                                      | P18136 KV313_HUMAN | 5  | 33.33 | 2  | 0.7875 | 0.3210 |
| Zinc-alpha-2-glycoprotein precursor - Homo sapiens (Human)                                            | P25311 ZA2G_HUMAN  | 11 | 26.44 | 15 | 1.1274 | 0.2614 |
| Tyrosine-protein kinase receptor UFO precursor - Homo sapiens (Human)                                 | P30530 UFO_HUMAN   | 4  | 24.80 | 5  | 0.7492 | 0.1187 |
| Collagen alpha-1(XV) chain precursor [Contains: Endostatin - Homo sapiens (Human)]                    | P39059 COFA1_HUMAN | 6  | 21.61 | 2  | 0.7895 | 0.1837 |
| Prostaglandin-H2 D-isomerase precursor - Homo sapiens (Human)                                         | P41222 PTGDS_HUMAN | 11 | 36.84 | 15 | 0.7418 | 0.2665 |
| Probable RNA-binding protein 25 - Homo sapiens (Human)                                                | P49756 RBM25_HUMAN | 4  | 11.35 | 1  | 0.5458 | 0.2946 |
| Cadherin-13 precursor - Homo sapiens (Human)                                                          | P55290 CAD13_HUMAN | 6  | 14.45 | 3  | 0.6433 | 0.4150 |
| Beta-defensin 1 precursor - Homo sapiens (Human)                                                      | P60022 BD01_HUMAN  | 3  | 23.53 | 1  | 0.7317 | 0.3554 |
| HERV-K_12q14.1 provirus ancestral Env polyprotein precursor - Homo sapiens (Human)                    | P61565 ENK1_HUMAN  | 4  | 9.89  | 1  | 1.7548 | 1.8239 |
| Ubiquitin - Homo sapiens (Human)                                                                      | P62988 UBIQ_HUMAN  | 6  | 47.37 | 3  | 1.2032 | 0.5091 |
| Basement membrane-specific heparan sulfate proteoglycan core protein precursor - Homo sapiens (Human) | P98160 PGBM_HUMAN  | 34 | 39.22 | 17 | 0.8102 | 0.1802 |
| Ecotropic virus integration site 1 protein homolog - Homo sapiens (Human)                             | Q03112 EVI1_HUMAN  | 2  | 10.85 | 1  | 1.2203 | 0.2382 |
| Vesicular integral-membrane protein VIP36                                                             | Q12907 LMAN2_HUMAN | 3  | 14.33 | 5  | 1.3922 | 0.6357 |

Optimizing a proteomics platform for urine biomarker discovery

|                                                                                      |                     |    |       |   |        |        |
|--------------------------------------------------------------------------------------|---------------------|----|-------|---|--------|--------|
| precursor - Homo sapiens (Human)                                                     |                     |    |       |   |        |        |
| Protein FAM53B - Homo sapiens (Human)                                                | Q14153 FA53B_HUMAN  | 2  | 8.06  | 1 | 0.8176 | 0.1152 |
| Inositol 1,4,5-trisphosphate receptor type 2 - Homo sapiens (Human)                  | Q14571 ITPR2_HUMAN  | 10 | 5.70  | 1 | 1.0841 | 0.4607 |
| Inter-alpha-trypsin inhibitor heavy chain H4 precursor - Homo sapiens (Human)        | Q14624 ITIH4_HUMAN  | 2  | 11.51 | 2 | 0.7147 | 0.2537 |
| Ras GTPase-activating protein 2 - Homo sapiens (Human)                               | Q15283 IRASA2_HUMAN | 4  | 9.78  | 1 | 0.8142 | 0.6594 |
| Myosin light chain kinase, smooth muscle - Homo sapiens (Human)                      | Q15746 MYLK_HUMAN   | 3  | 5.59  | 2 | 1.0426 | 0.4848 |
| Insulin-like growth factor-binding protein 7 precursor - Homo sapiens (Human)        | Q16270 IBP7_HUMAN   | 2  | 20.92 | 2 | 0.5063 | 0.2361 |
| Protein inscuteable homolog - Homo sapiens (Human)                                   | Q1MX18 INSC_HUMAN   | 2  | 11.74 | 2 | 0.4687 | 0.1161 |
| Acyl-CoA synthetase family member 3, mitochondrial precursor - Homo sapiens (Human)  | Q4G176 ACSF3_HUMAN  | 3  | 8.51  | 1 | 0.5887 | 0.4748 |
| Zinc finger protein 618 - Homo sapiens (Human)                                       | Q5T7W0 ZN618_HUMAN  | 7  | 15.09 | 3 | 0.8485 | 0.1301 |
| Vasorin precursor - Homo sapiens (Human)                                             | Q6EMK4 VASN_HUMAN   | 6  | 26.30 | 4 | 0.9830 | 0.1128 |
| Leukocyte-associated immunoglobulin-like receptor 1 precursor - Homo sapiens (Human) | Q6GTX8 LAIR1_HUMAN  | 3  | 25.78 | 1 | 0.9155 | 0.1023 |
| Glutamate decarboxylase-like protein 1 - Homo sapiens (Human)                        | Q6ZQY3 GADL1_HUMAN  | 5  | 9.36  | 2 | 2.4496 | 2.3038 |
| Extracellular sulfatase Sulf-2 precursor - Homo sapiens (Human)                      | Q8IWU5 SULF2_HUMAN  | 3  | 12.53 | 3 | 1.0630 | 0.0575 |
| Transmembrane protein 87A precursor - Homo sapiens (Human)                           | Q8NBN3 TM87A_HUMAN  | 4  | 11.71 | 1 | 1.0364 | 0.2503 |
| Mucin-16 - Homo sapiens (Human)                                                      | Q8WXI7 MUC16_HUMAN  | 53 | 18.87 | 6 | 0.7994 | 0.2665 |
| Far upstream element-binding protein 2 - Homo sapiens (Human)                        | Q92945 FUBP2_HUMAN  | 2  | 16.76 | 1 | 0.3370 | 0.0707 |
| Ciliary dynein heavy chain 11 - Homo sapiens (Human)                                 | Q96DT5 DYH11_HUMAN  | 11 | 7.87  | 1 | 0.8457 | 0.6476 |
| Phosphoinositide-3-kinase-interacting protein 1 precursor - Homo sapiens (Human)     | Q96FE7 IP3IP1_HUMAN | 4  | 29.66 | 1 | 0.9102 | 0.4609 |
| Deubiquitinating protein VCIP135 - Homo sapiens (Human)                              | Q96JH7 VCIP1_HUMAN  | 8  | 12.93 | 2 | 2.2948 | 2.1098 |
| Cytochrome P450 2S1 - Homo sapiens (Human)                                           | Q96SQ9 CP2S1_HUMAN  | 6  | 13.69 | 2 | 0.7639 | 0.3965 |
| Mucin-4 precursor - Homo sapiens (Human)                                             | Q99102 MUC4_HUMAN   | 4  | 15.26 | 1 | 1.6605 | 1.4063 |



## Optimizing a proteomics platform for urine biomarker discovery

|                                                                                                                                     |                    |   |       |   |        |        |
|-------------------------------------------------------------------------------------------------------------------------------------|--------------------|---|-------|---|--------|--------|
| Cat eye syndrome critical region protein 2 - Homo sapiens (Human)                                                                   | Q9BXF3 CECR2_HUMAN | 4 | 13.34 | 1 | 0.8728 | 0.5654 |
| Leucine-rich repeat-containing protein 27 - Homo sapiens (Human)                                                                    | Q9C0I9 LRC27_HUMAN | 2 | 11.70 | 2 | 0.7084 | 0.2458 |
| SWI/SNF-related matrix-associated actin-dependent regulator of chromatin subfamily A containing DEAD/H box 1 - Homo sapiens (Human) | Q9H4L7 SMRCD_HUMAN | 4 | 4.19  | 3 | 1.5414 | 0.5041 |
| Ubinuclein - Homo sapiens (Human)                                                                                                   | Q9NPG3 UBN1_HUMAN  | 5 | 8.55  | 4 | 1.1698 | 0.2940 |
| Endothelial protein C receptor precursor - Homo sapiens (Human)                                                                     | Q9UNN8 EPCR_HUMAN  | 4 | 18.91 | 4 | 0.8822 | 0.3646 |
| Trinucleotide repeat-containing gene 6B protein - Homo sapiens (Human)                                                              | Q9UPQ9 TNC6B_HUMAN | 4 | 16.83 | 2 | 1.4660 | 0.4725 |
| RAC-gamma serine/threonine-protein kinase - Homo sapiens (Human)                                                                    | Q9Y243 AKT3_HUMAN  | 2 | 10.86 | 1 | 1.0165 | 0.4775 |
| Protocadherin gamma A6 precursor - Homo sapiens (Human)                                                                             | Q9Y5G7 PCDG6_HUMAN | 6 | 10.41 | 1 | 1.2540 | 0.6009 |
